# Supplementary material
Source: PubMed Central journal article supplement (PMC4754155)

# Synthesis and Evaluation of 1,7-Diheteroarylhepta-1,4,7-trien-3-ones as Curcumin-Based Anticancer Agents

Rubing Wang<sup>a</sup>, Xiaojie Zhang<sup>a</sup>, Chengsheng Chen<sup>a</sup>, Guanglin Chen<sup>a</sup>, Qiu Zhong<sup>b</sup>, Qiang Zhang<sup>b</sup>,  
Shilong Zheng<sup>b</sup>, Guangdi Wang<sup>b,c</sup>, and Qiao-Hong Chen<sup>a,\*</sup>

<sup>a</sup>Department of Chemistry, California State University, Fresno, 2555 E. San Ramon Avenue, M/S  
SB70, Fresno, CA 93740, USA

<sup>b</sup>RCMI Cancer Research Center and <sup>c</sup>Department of Chemistry, Xavier University of Louisiana, 1  
Drexel Drive, New Orleans, LA 70125, USA

\* Corresponding author. Tel.: +1 559 2782394.  
E-mail address: [qchen@csufresno.edu](mailto:qchen@csufresno.edu)

**Supporting Information:** <sup>1</sup>H NMR and <sup>13</sup>C NMR spectra of final compounds

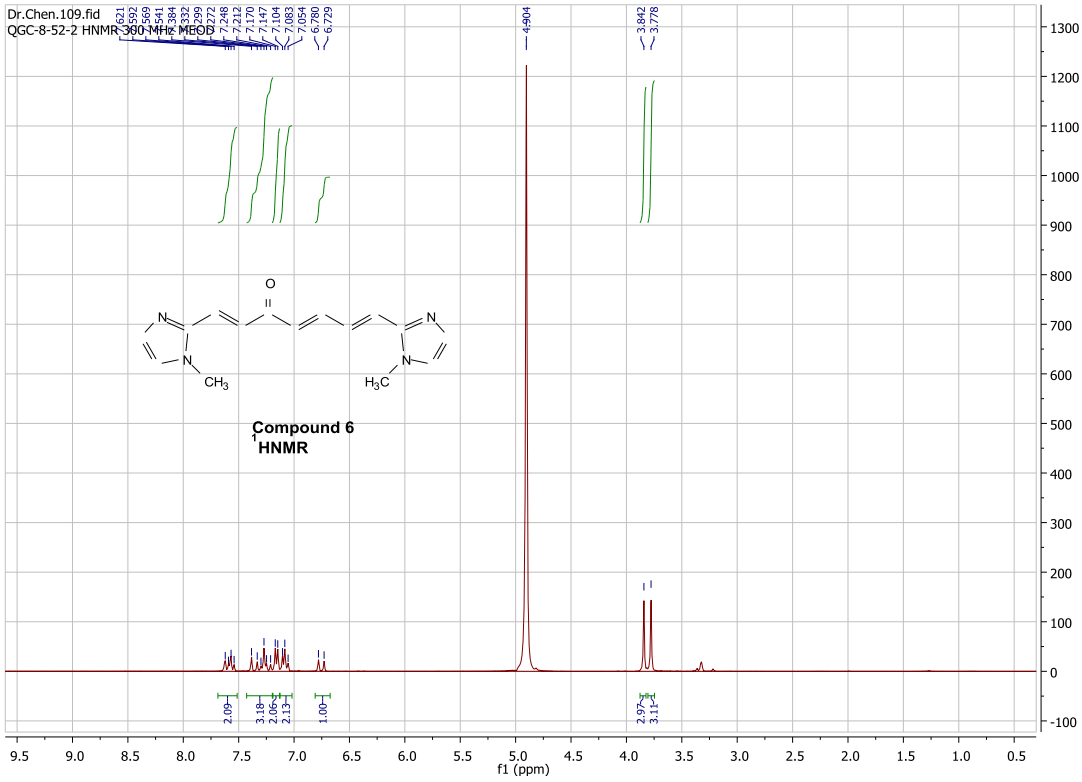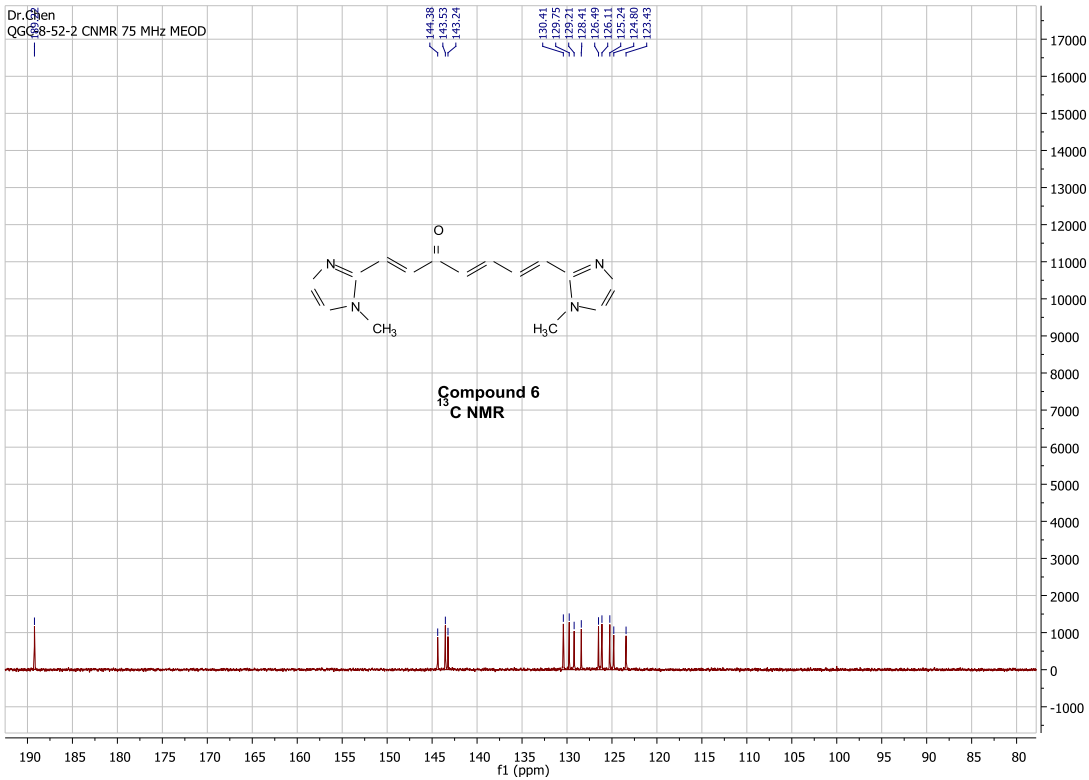

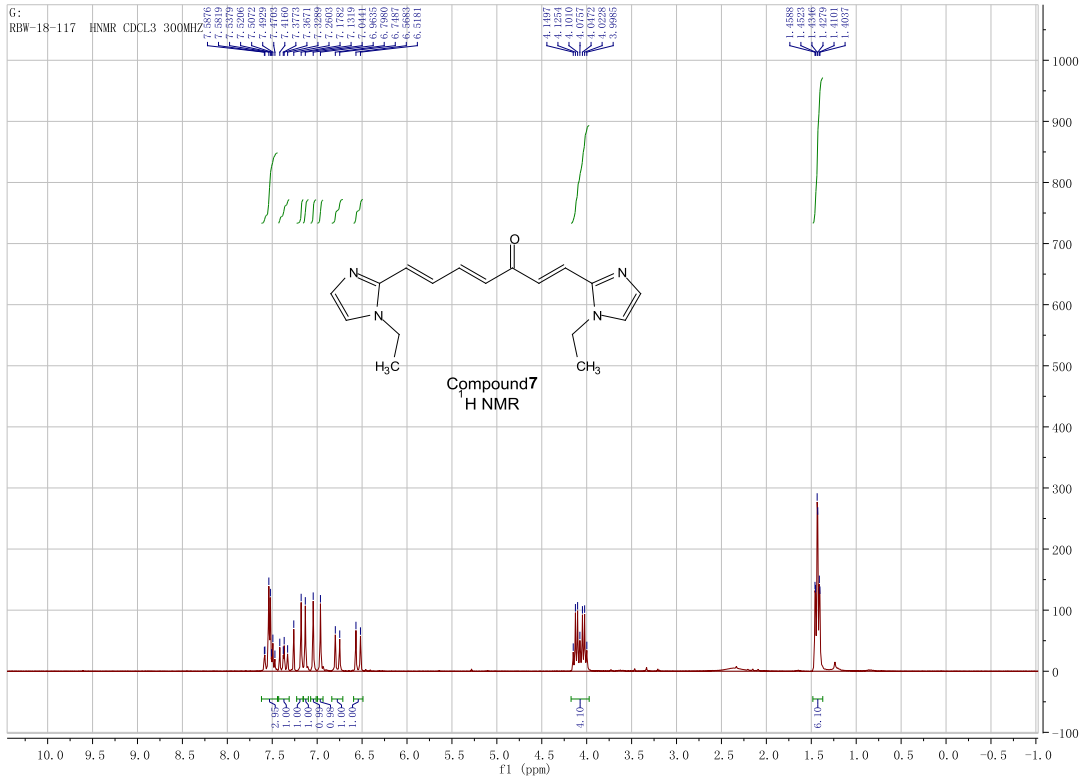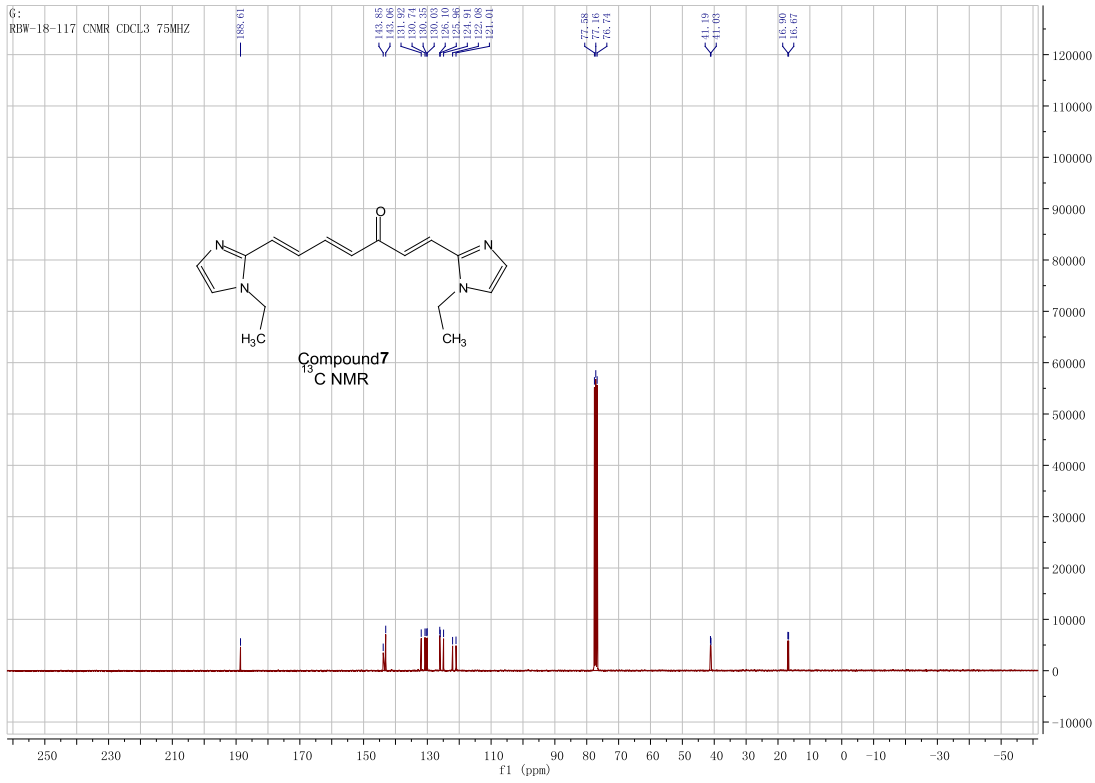

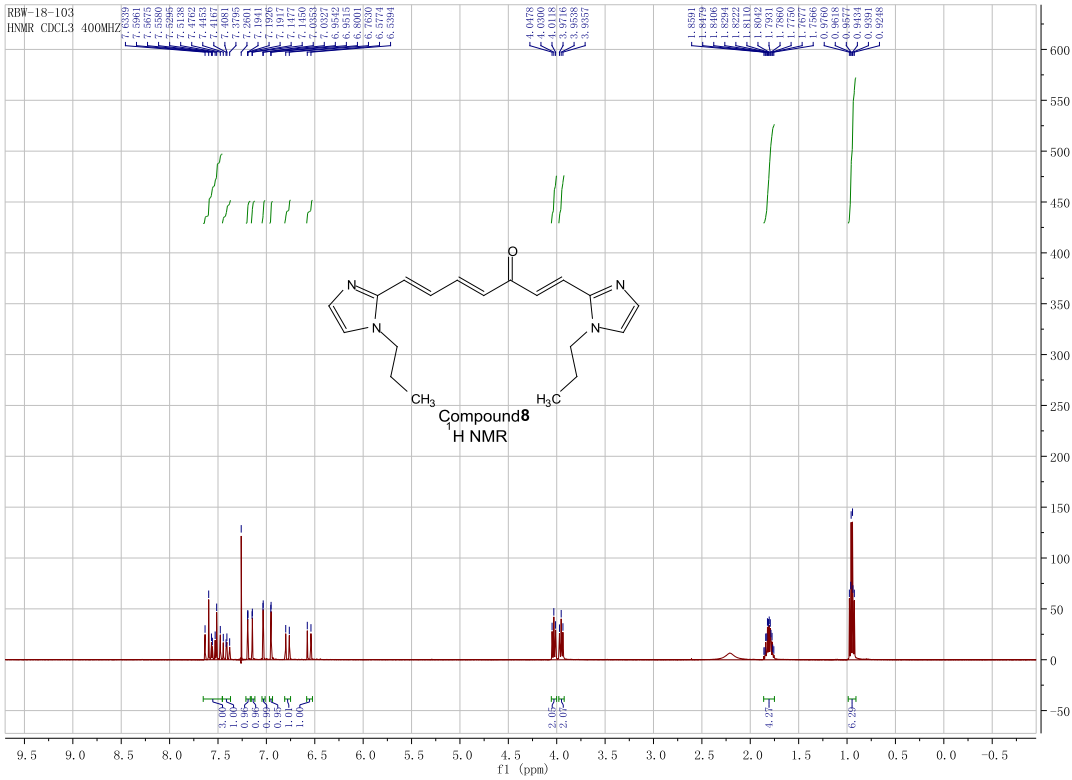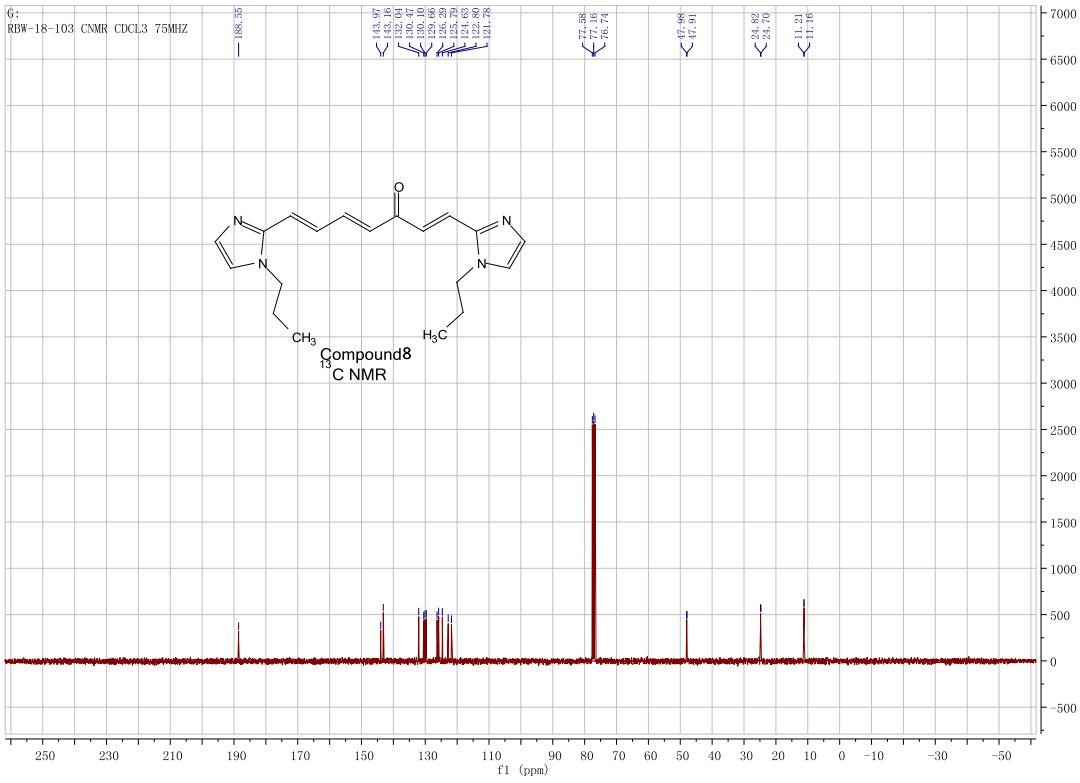

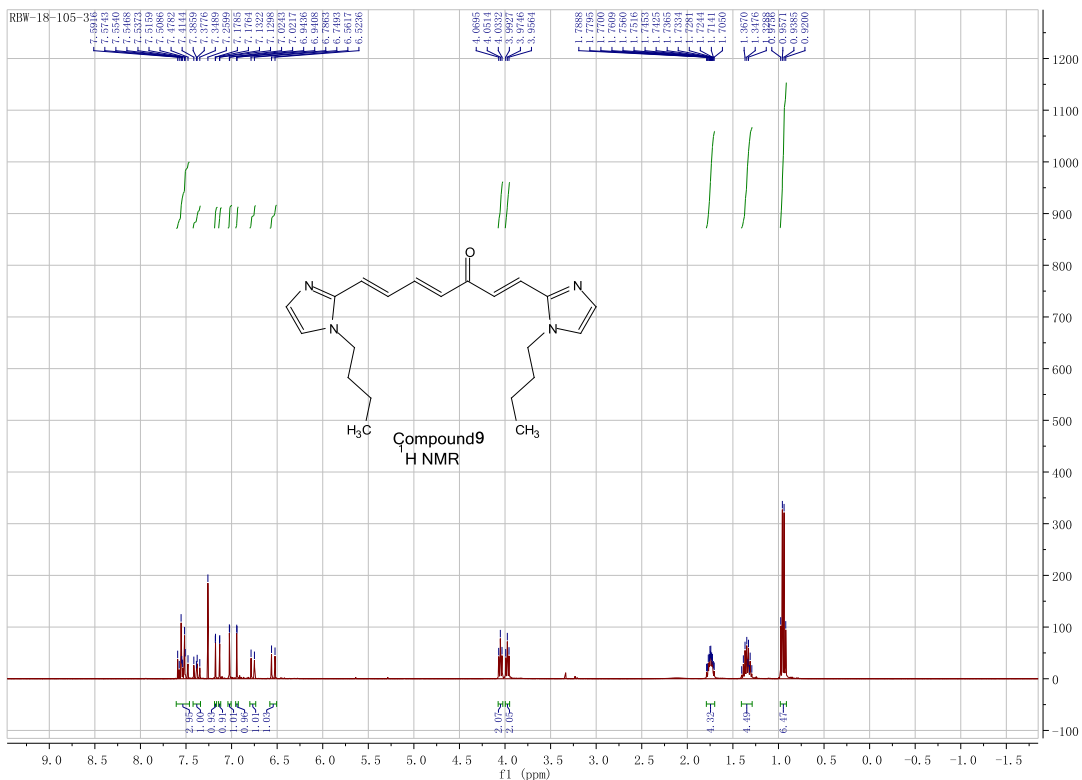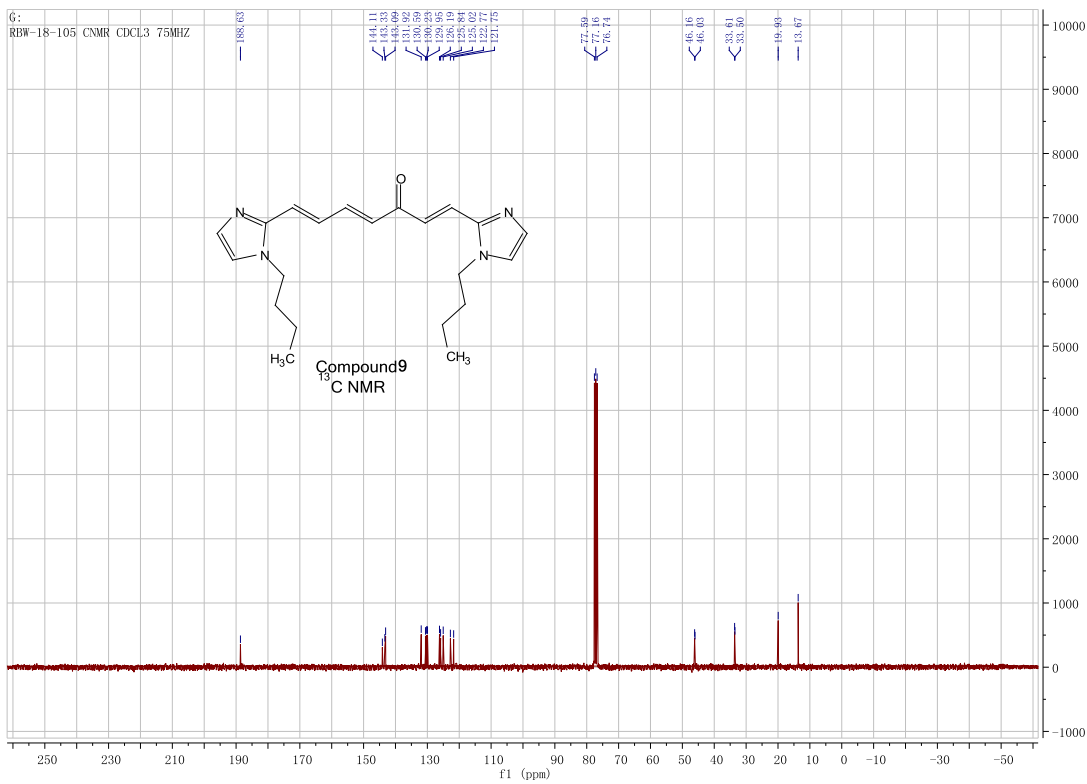

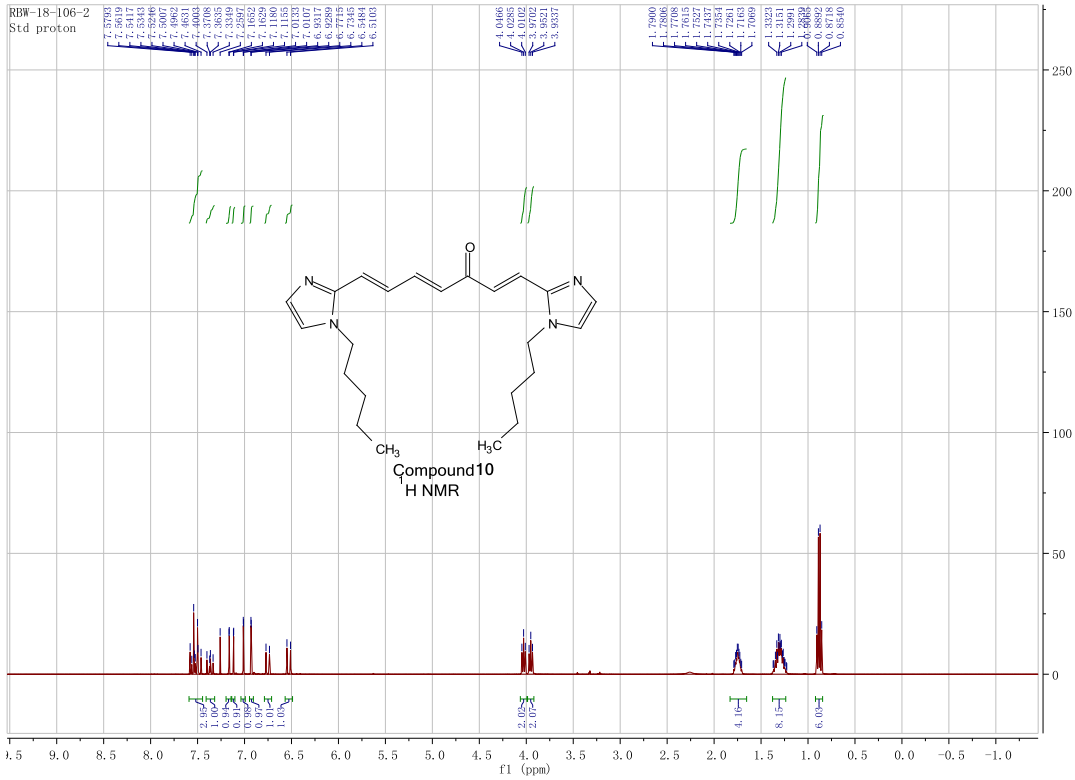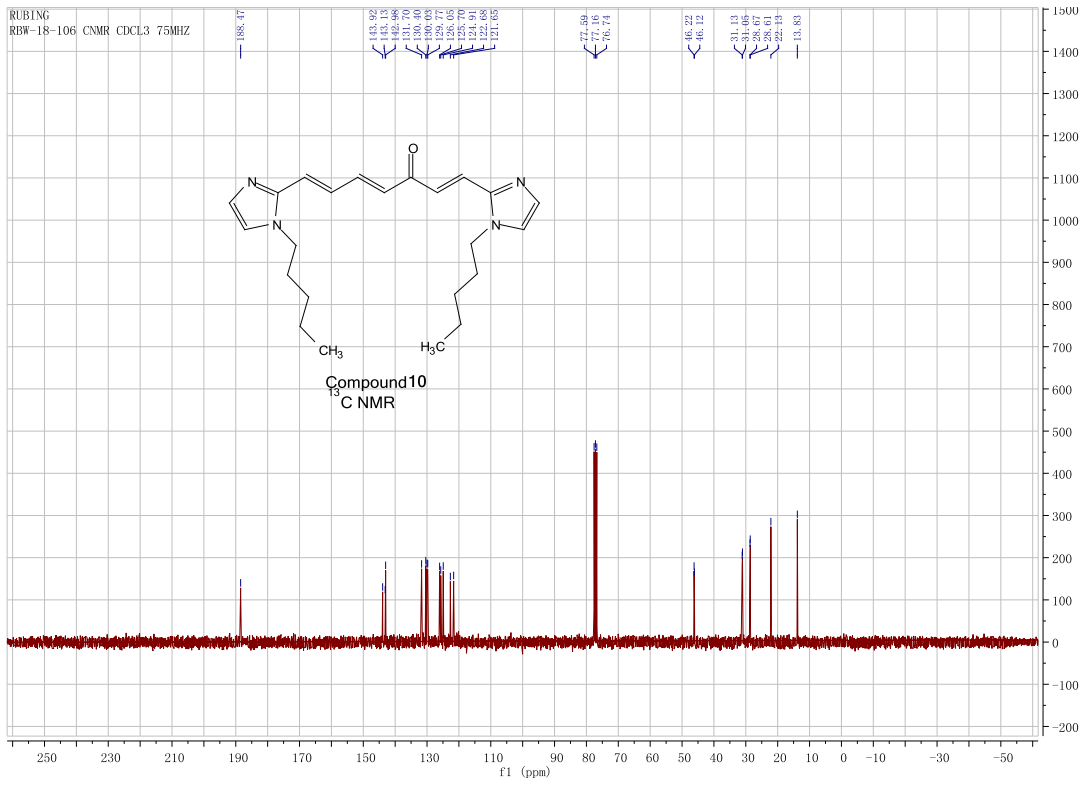

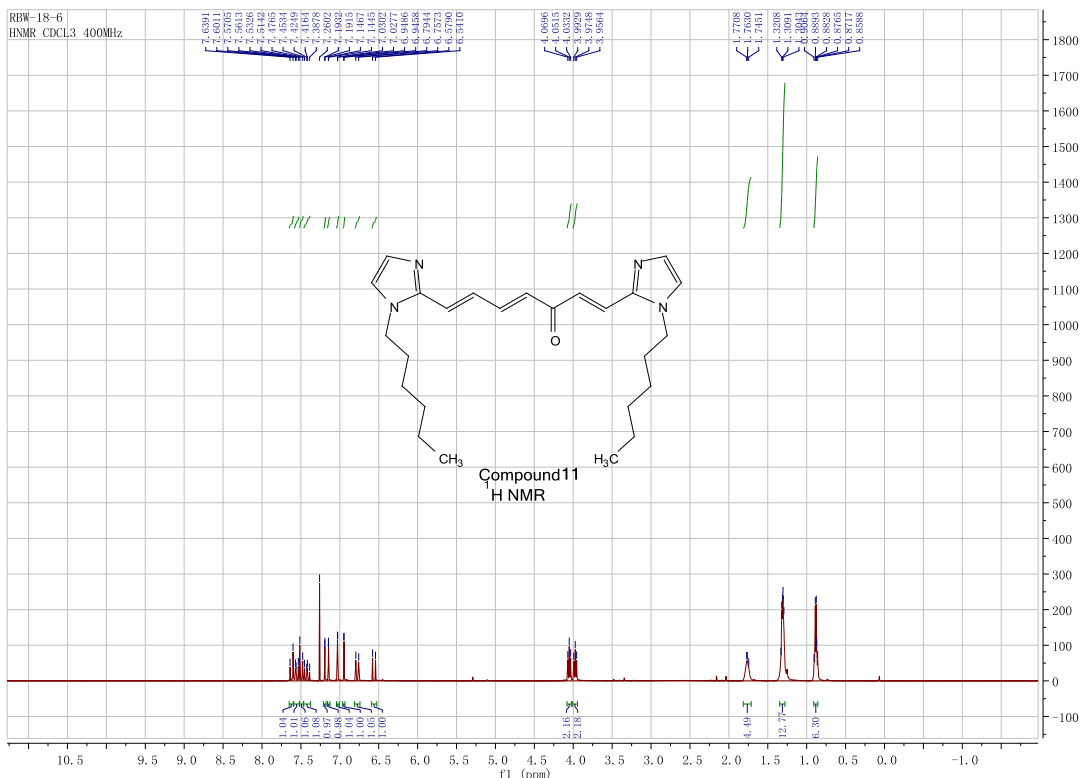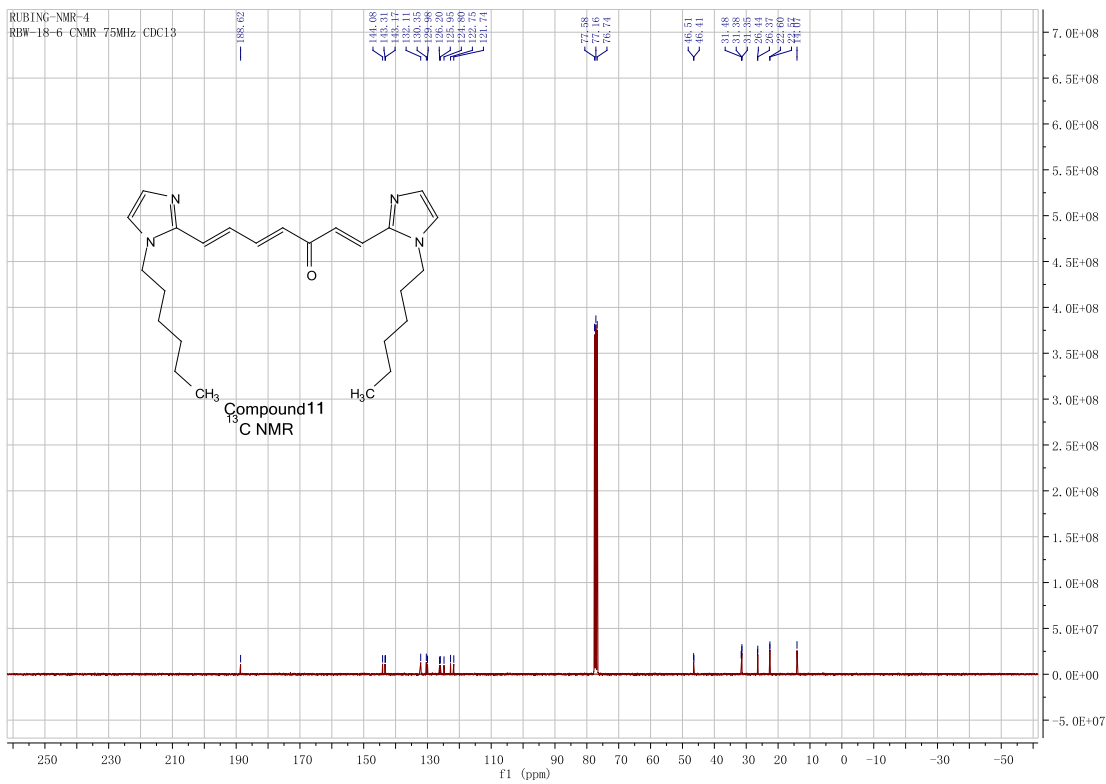

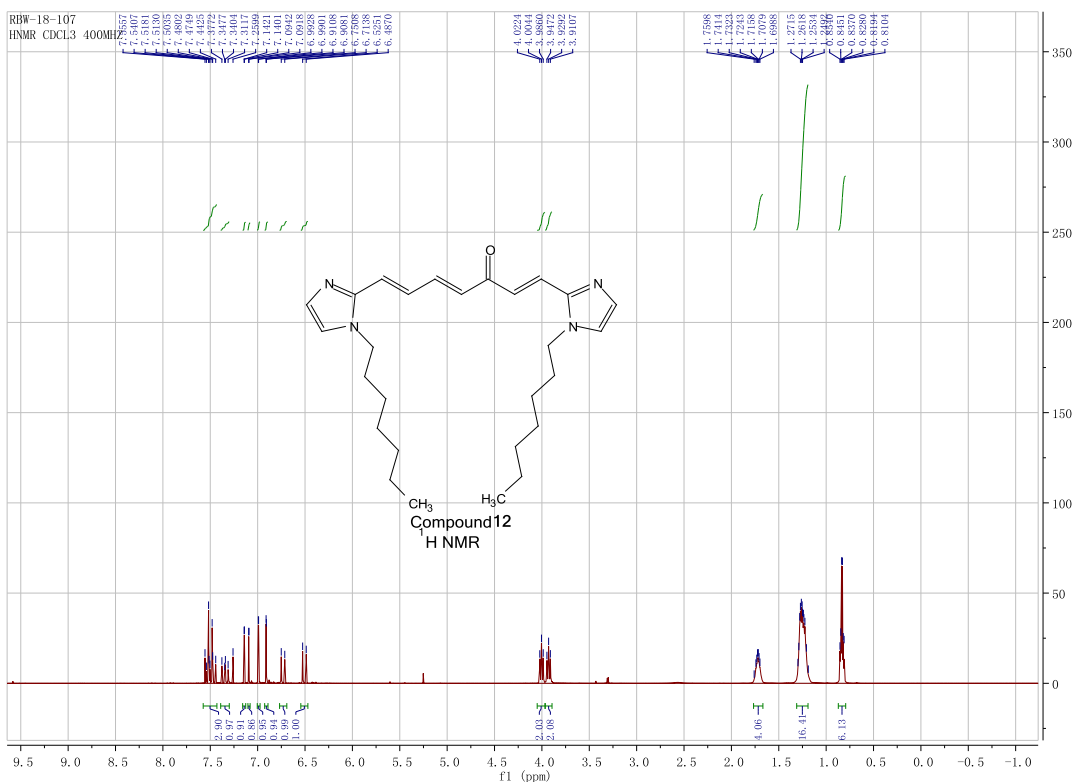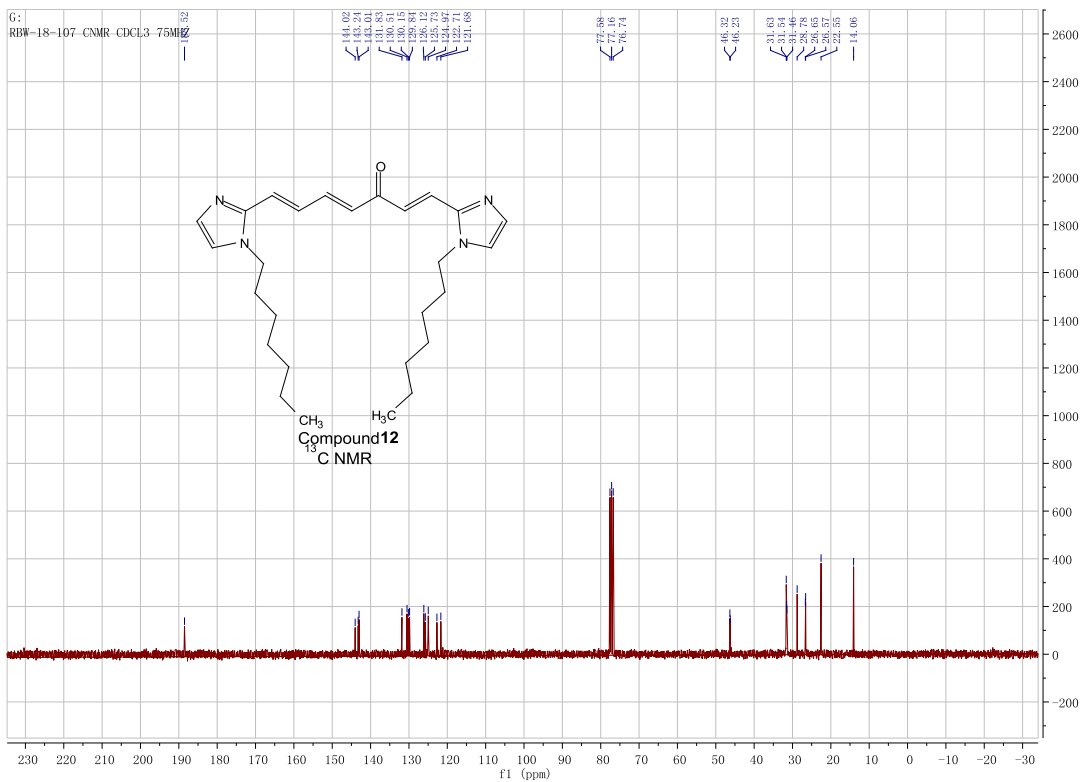



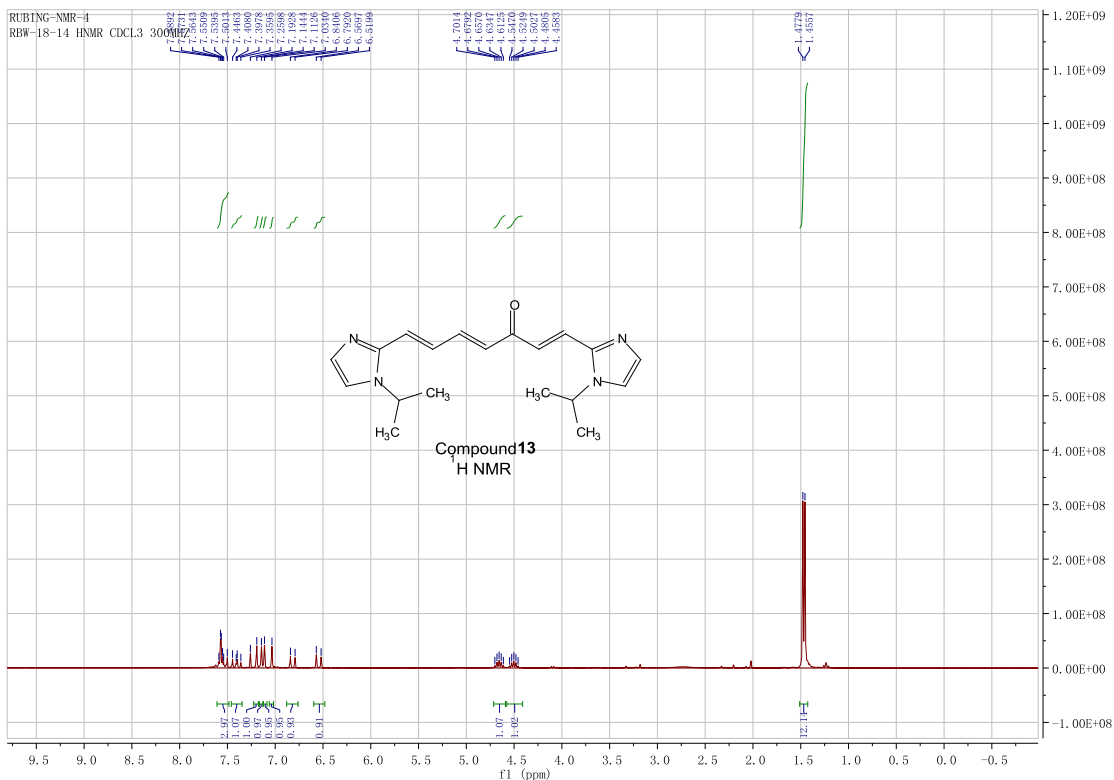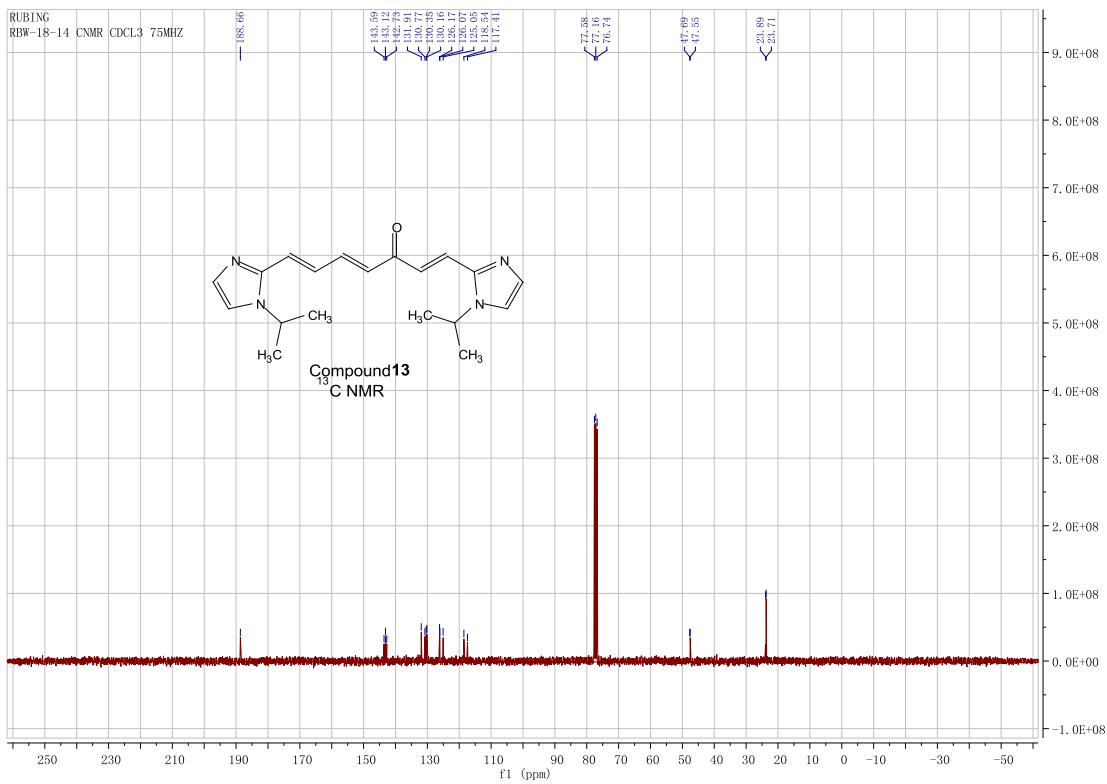

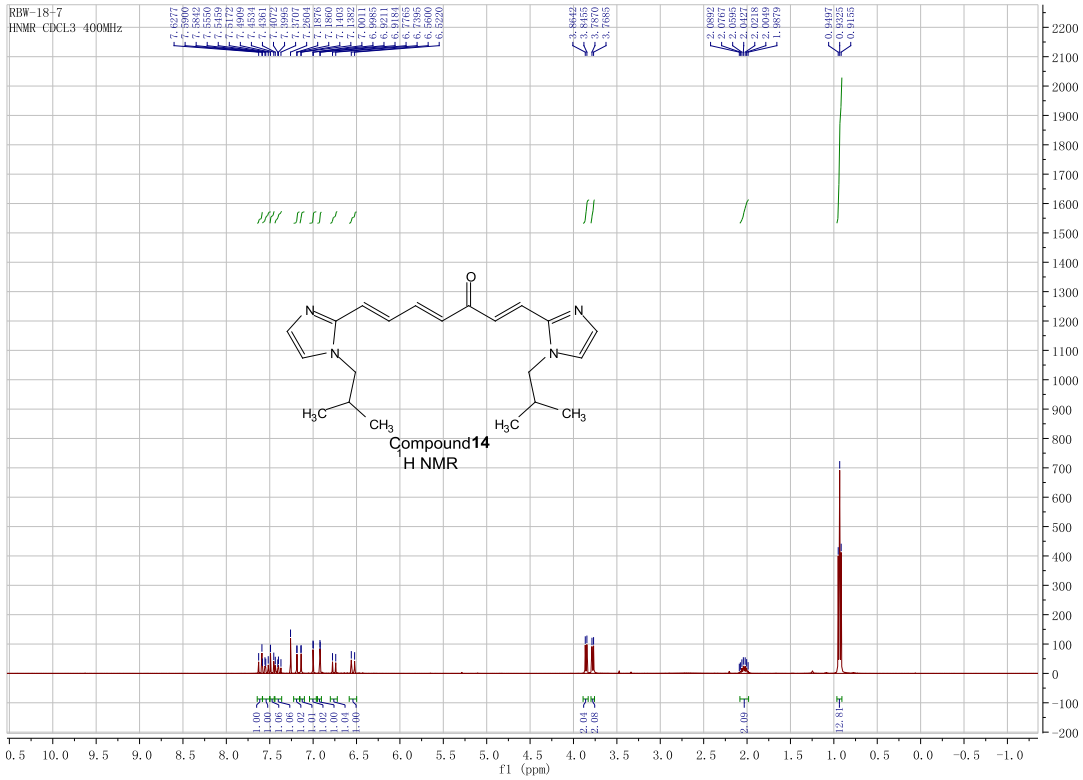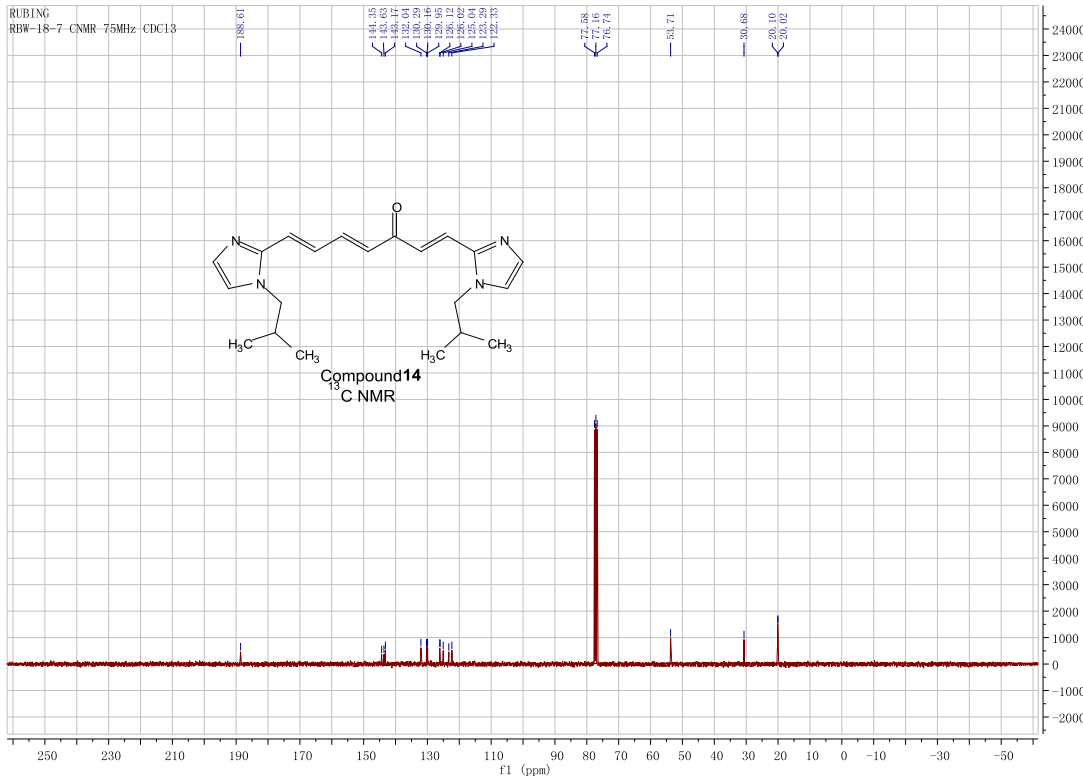

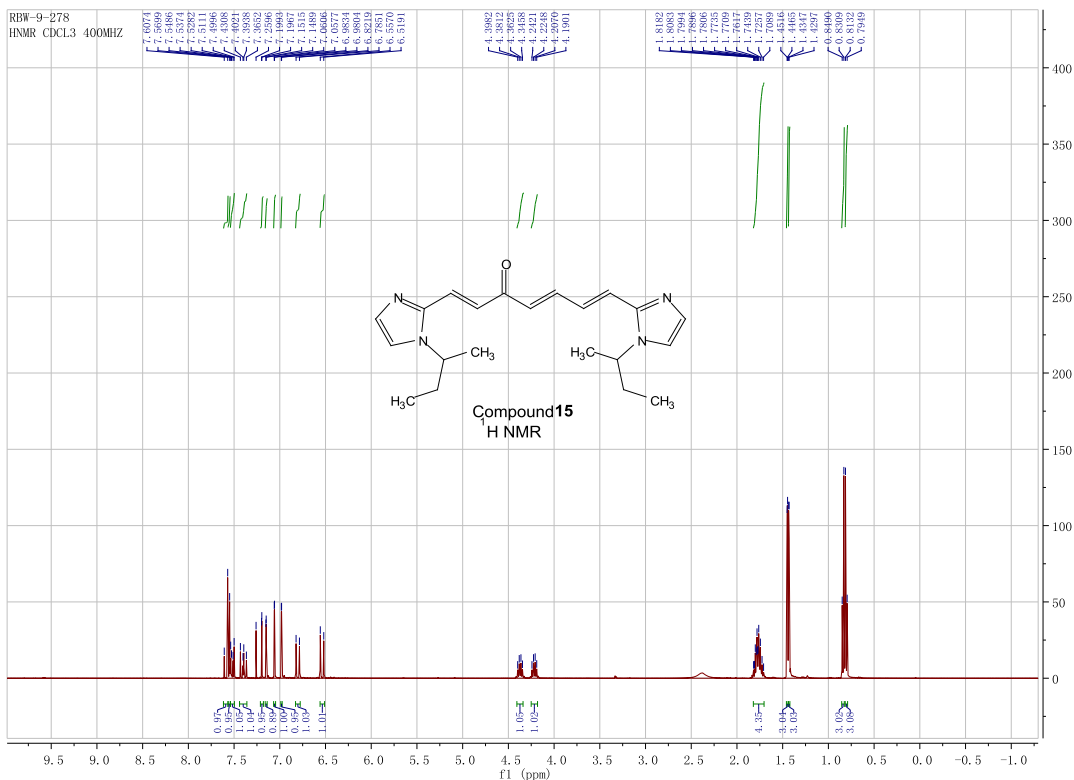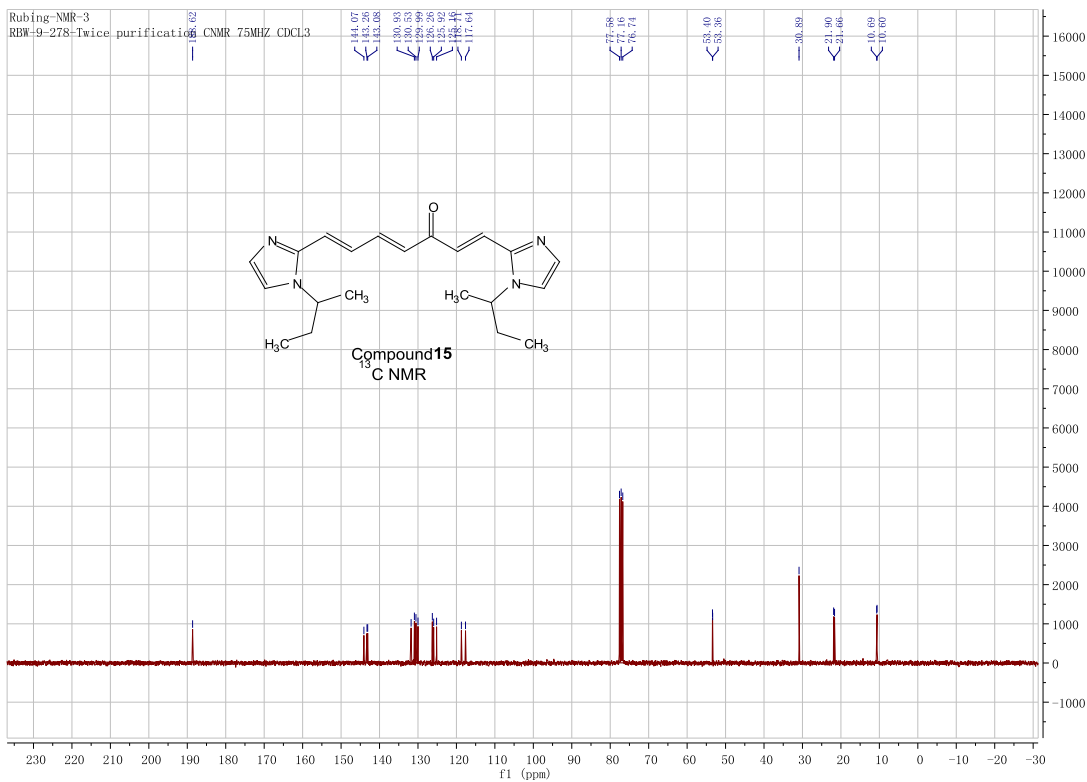

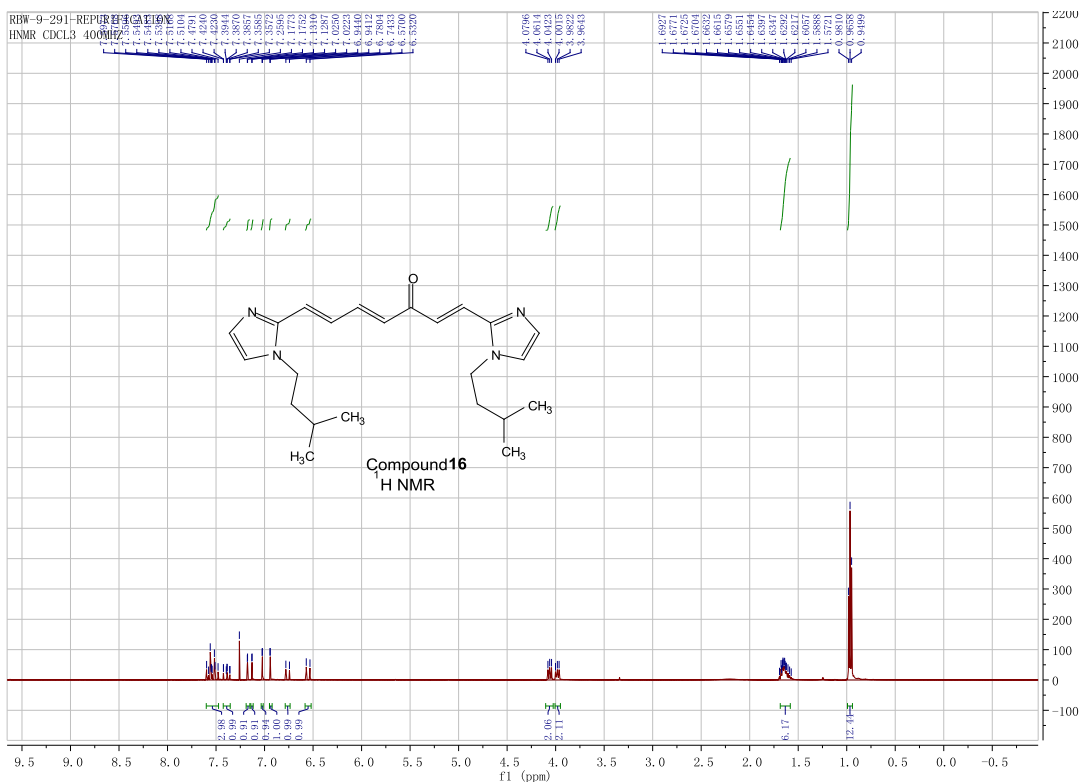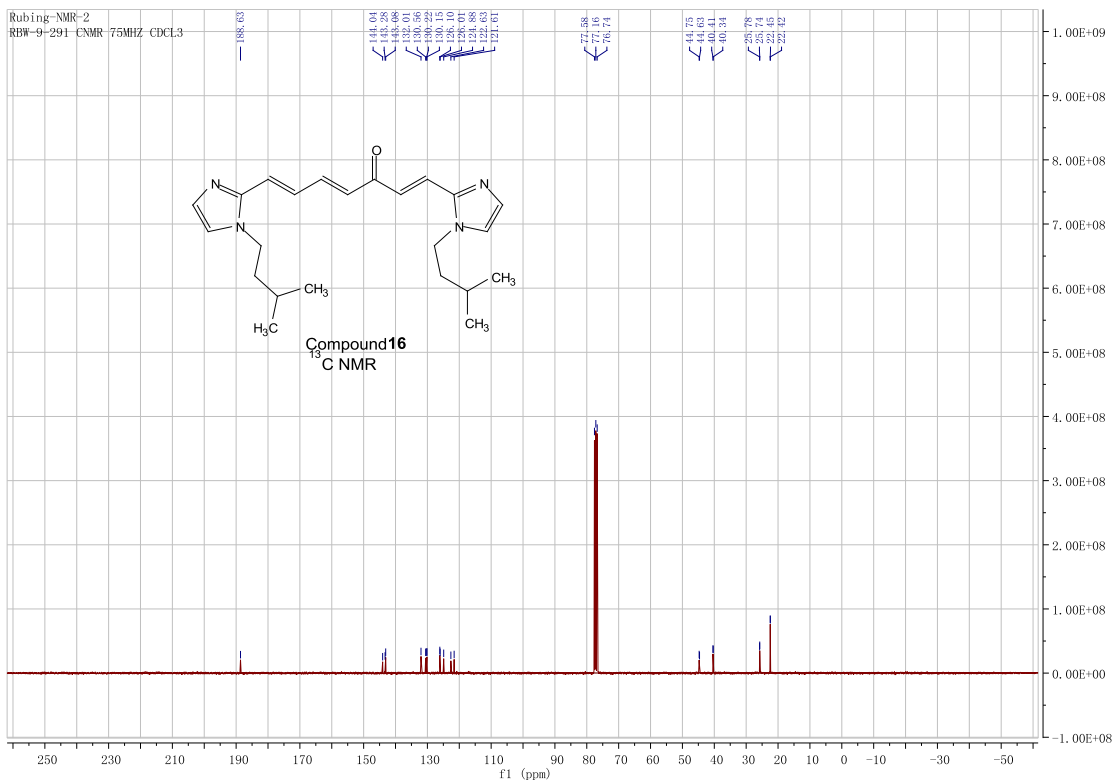

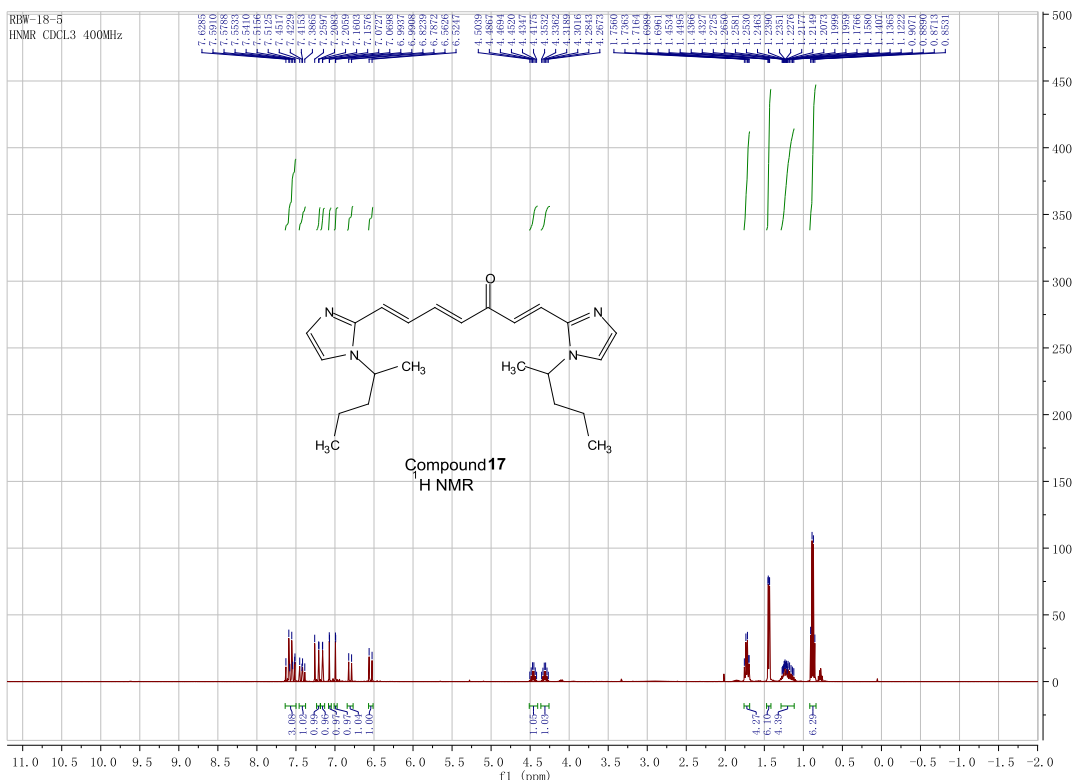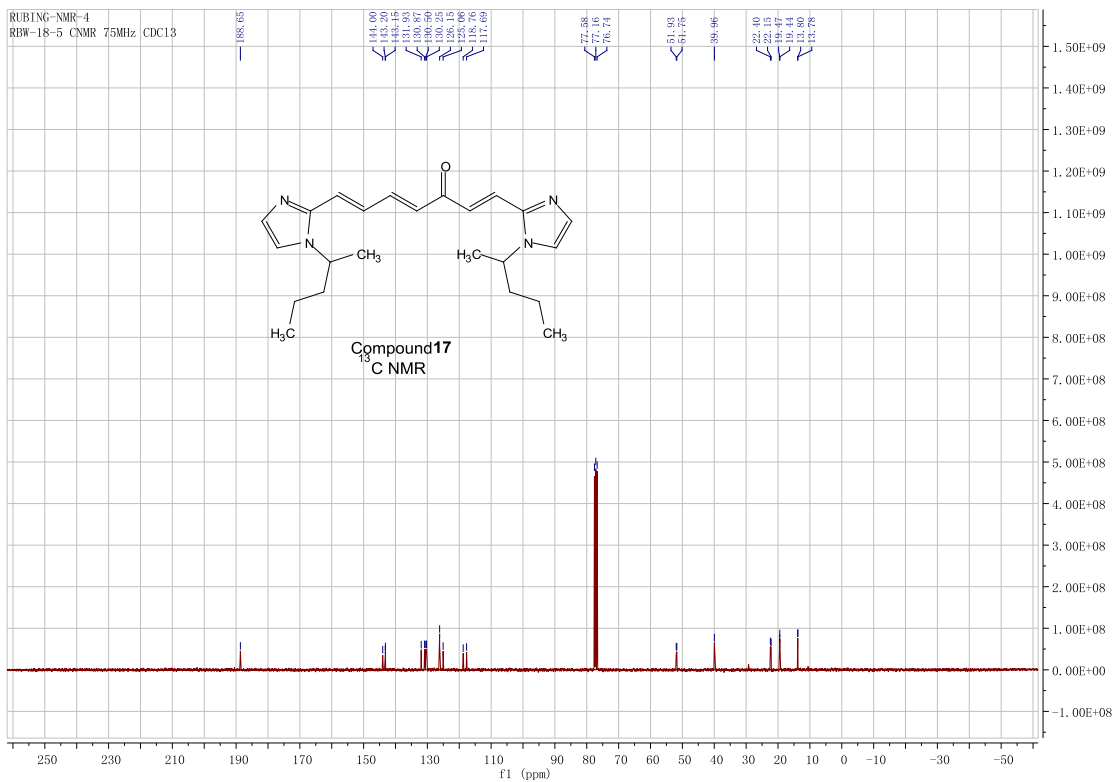



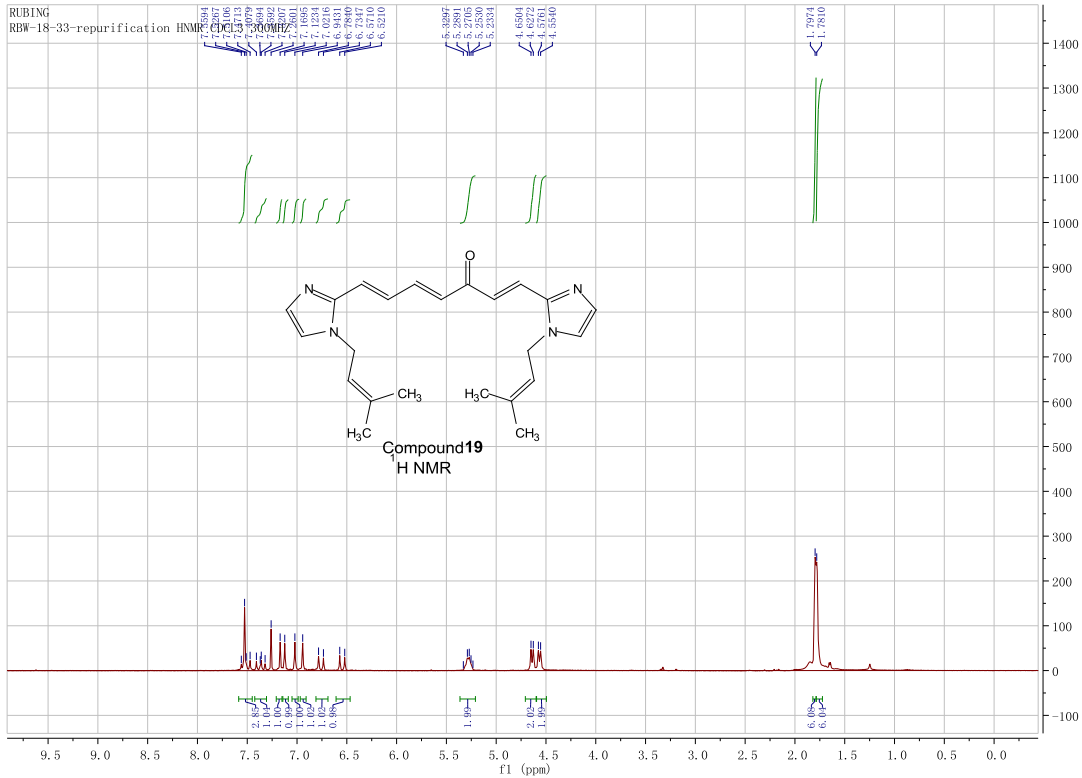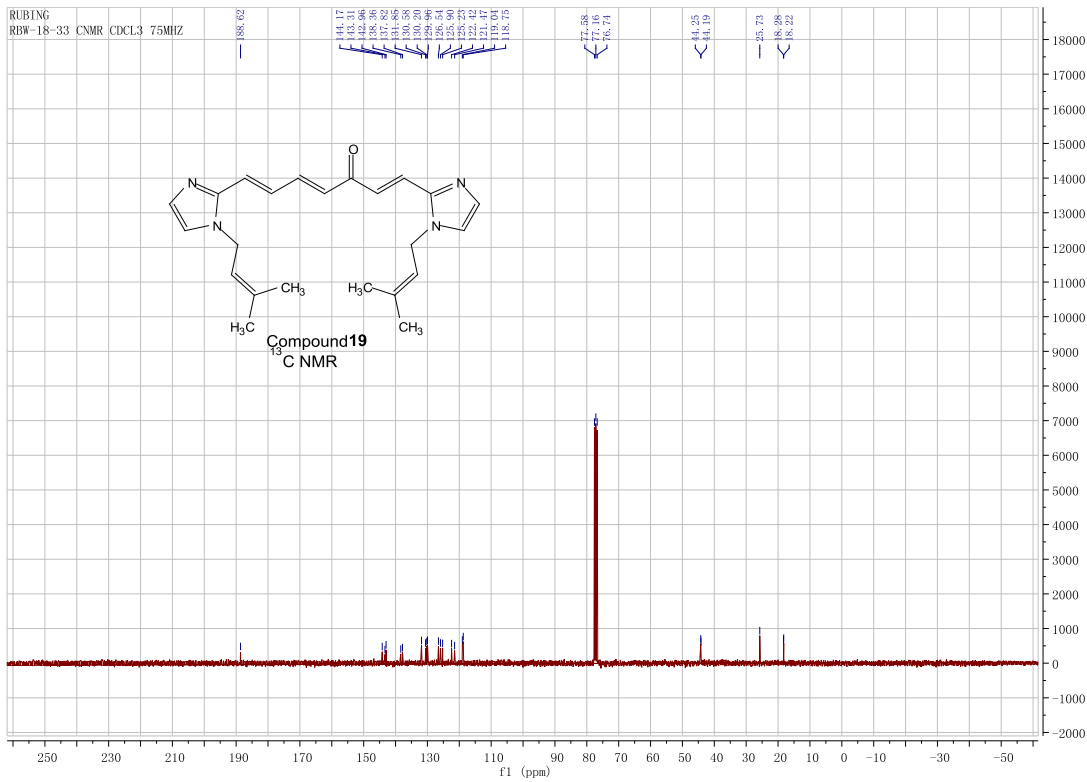

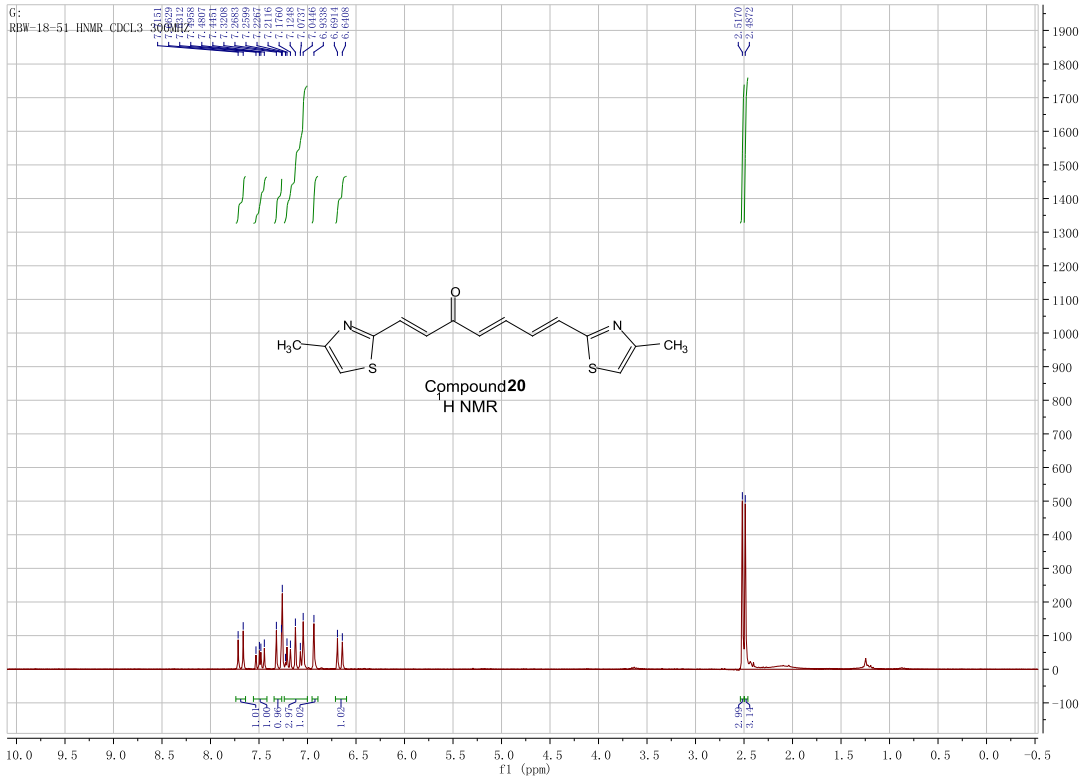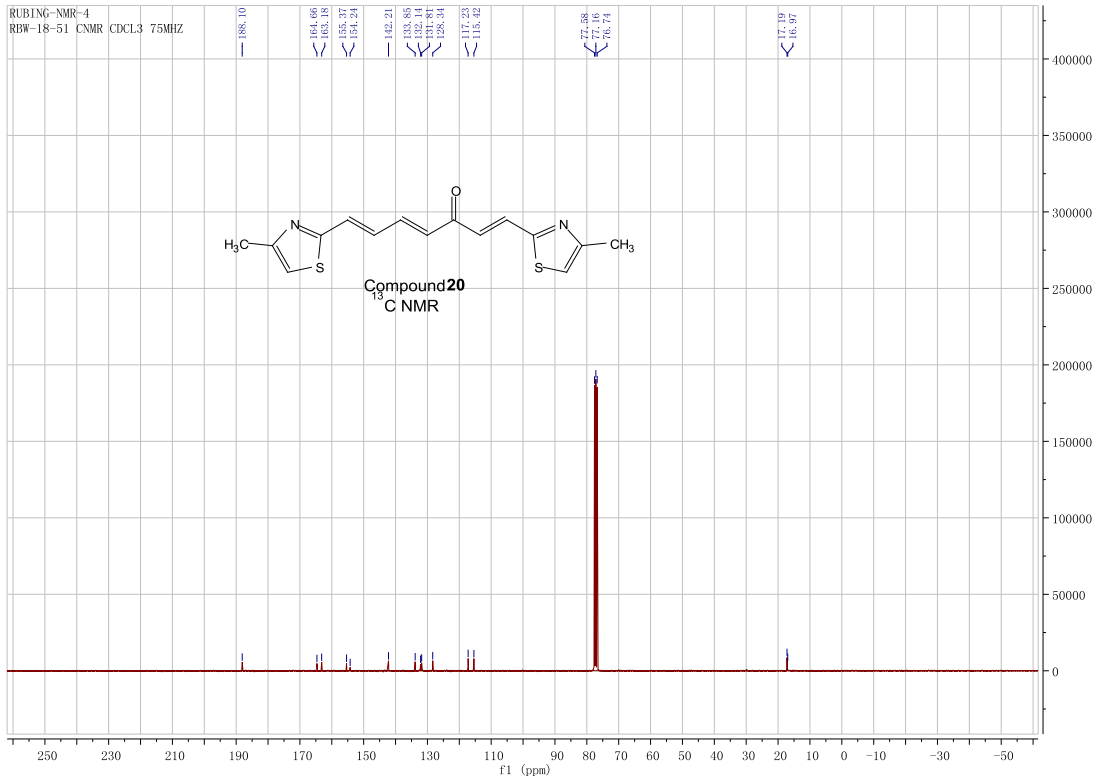



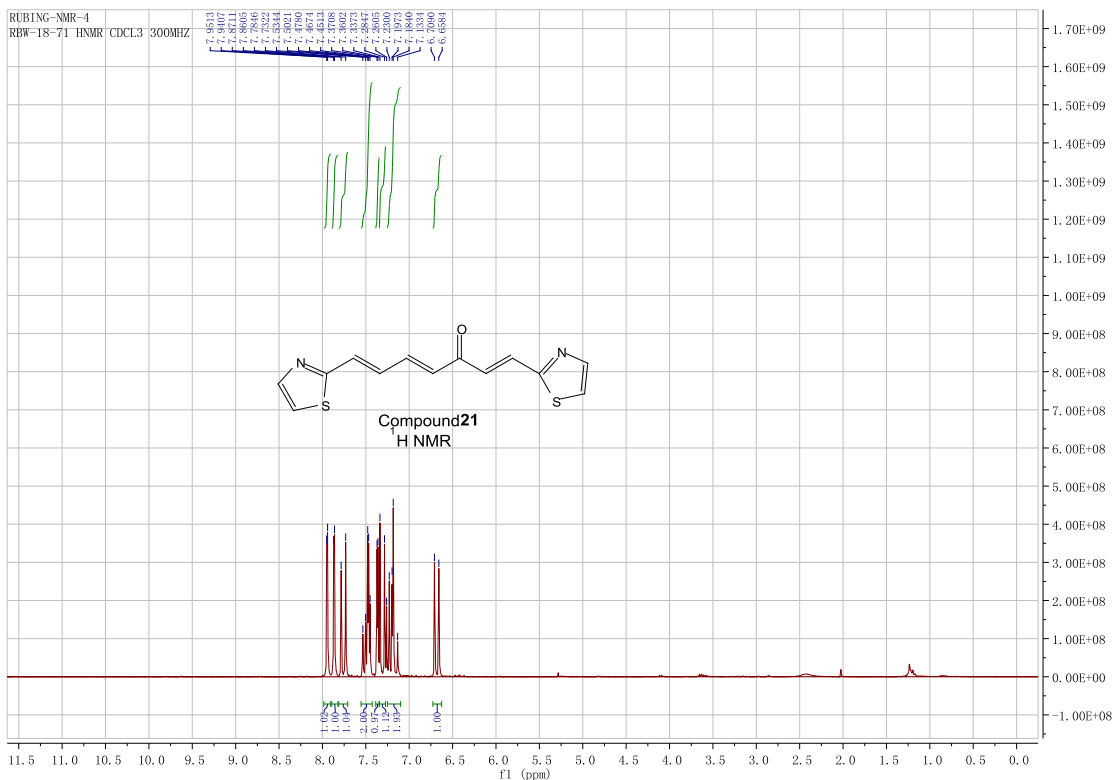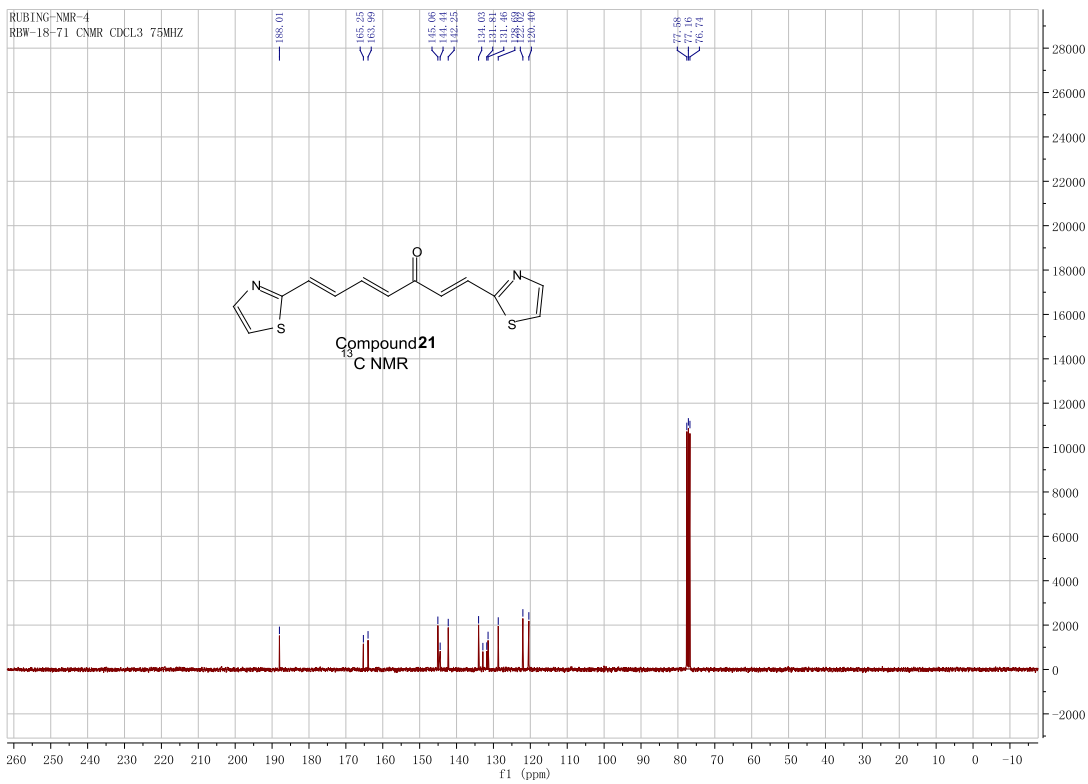

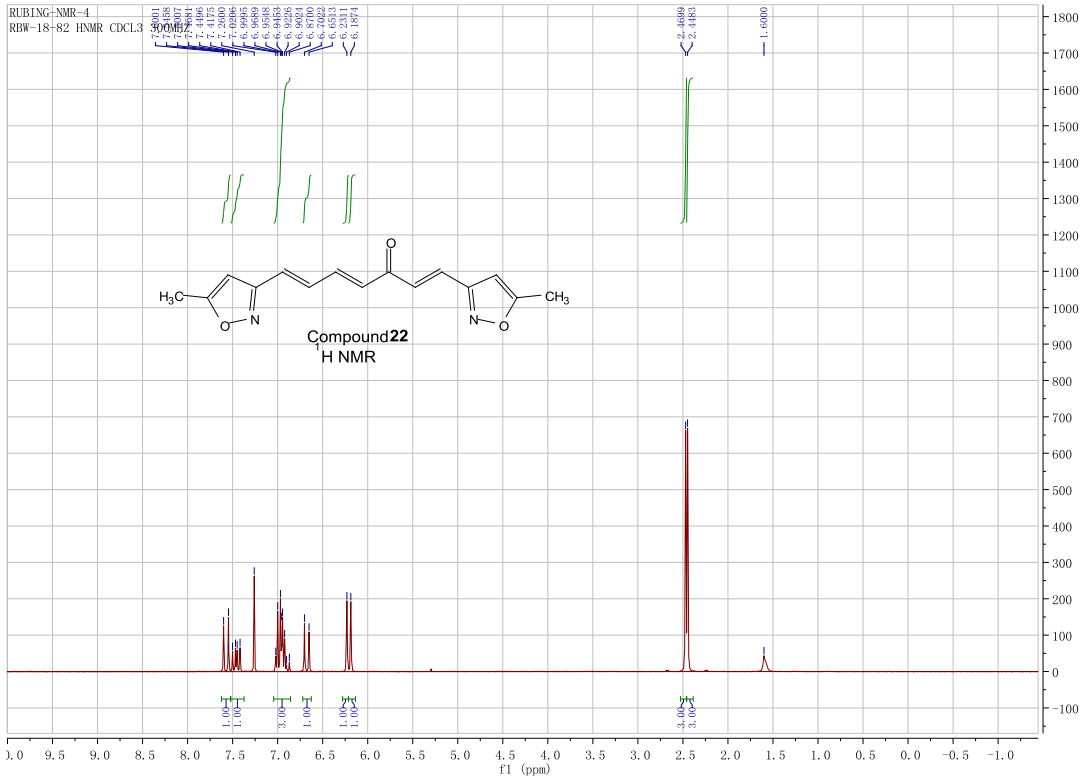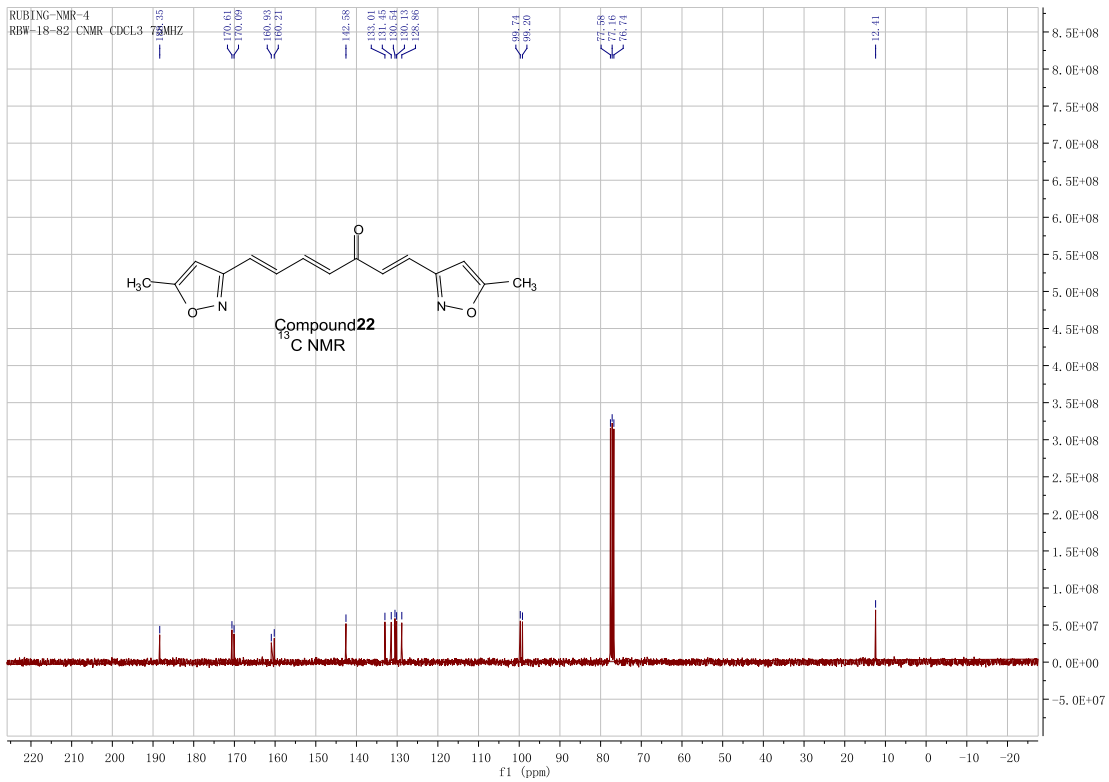

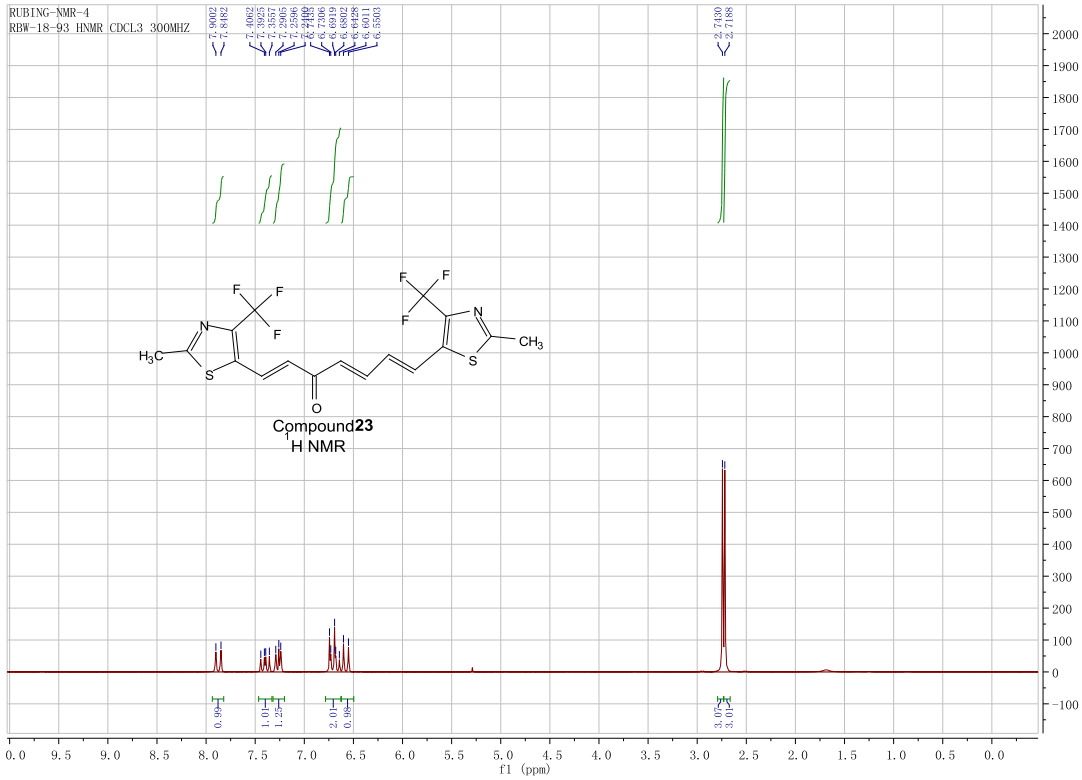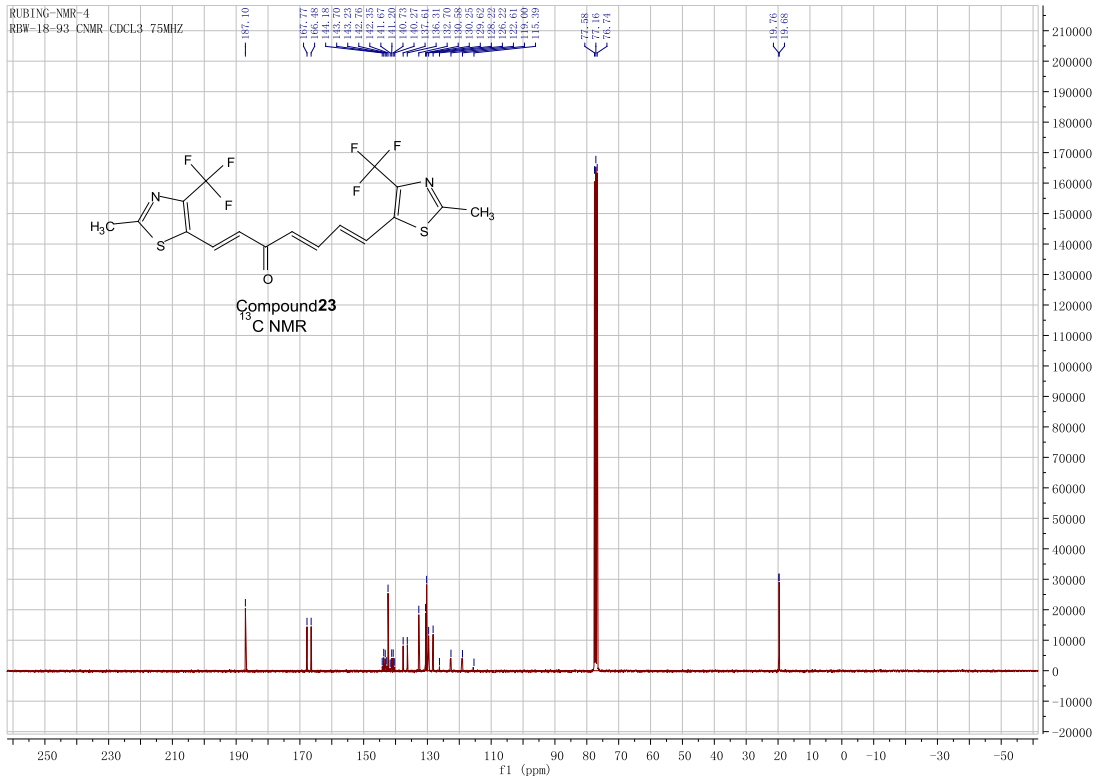

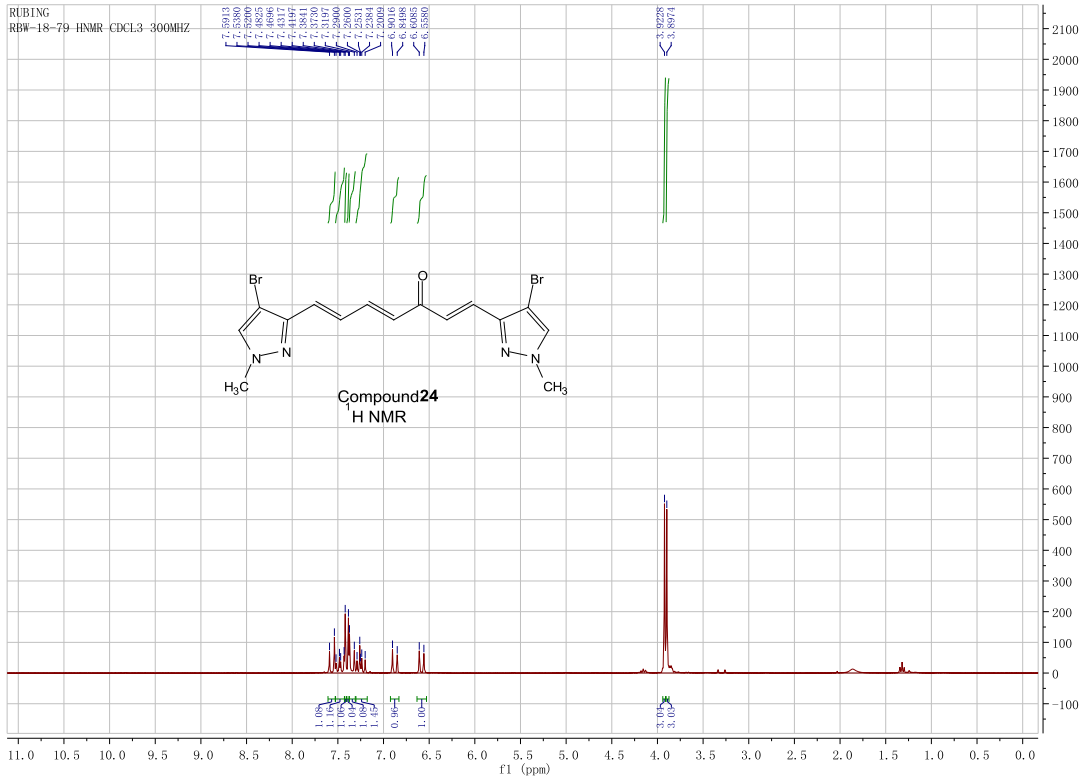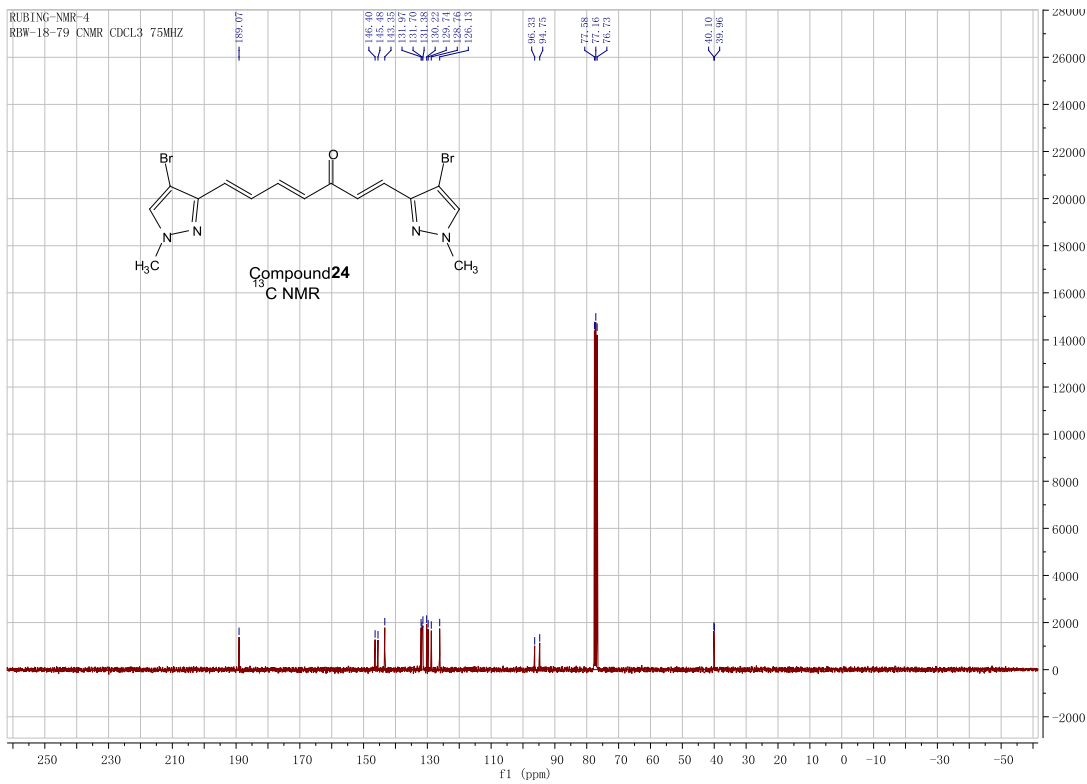



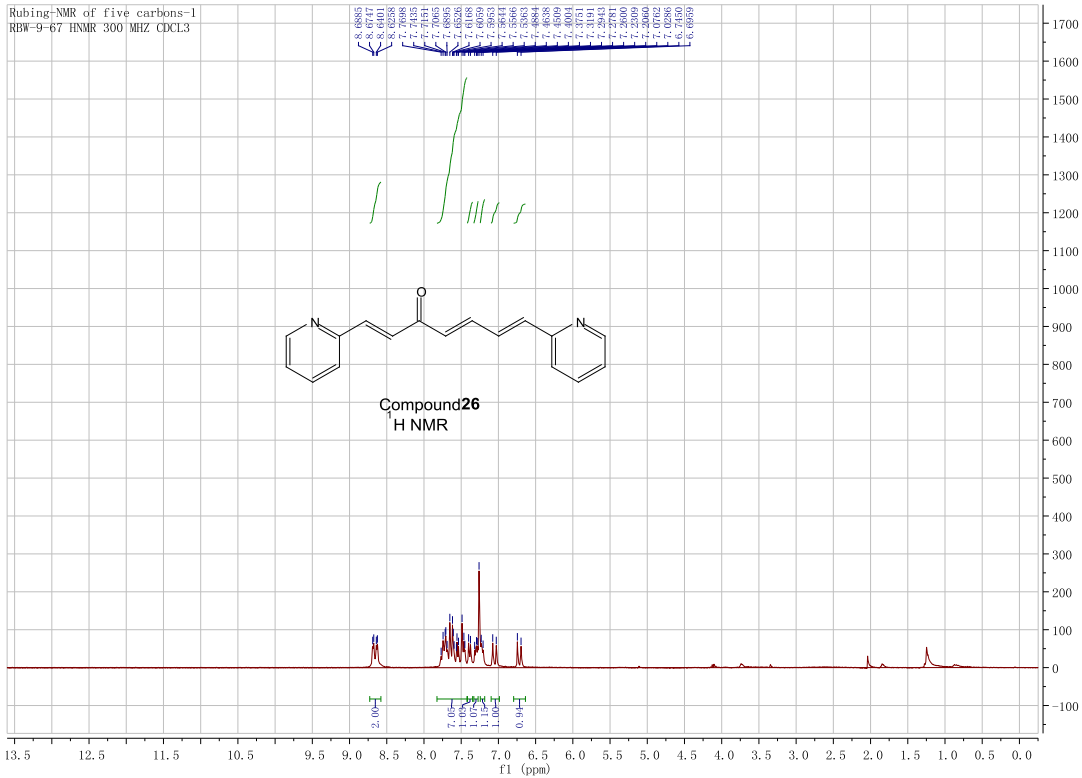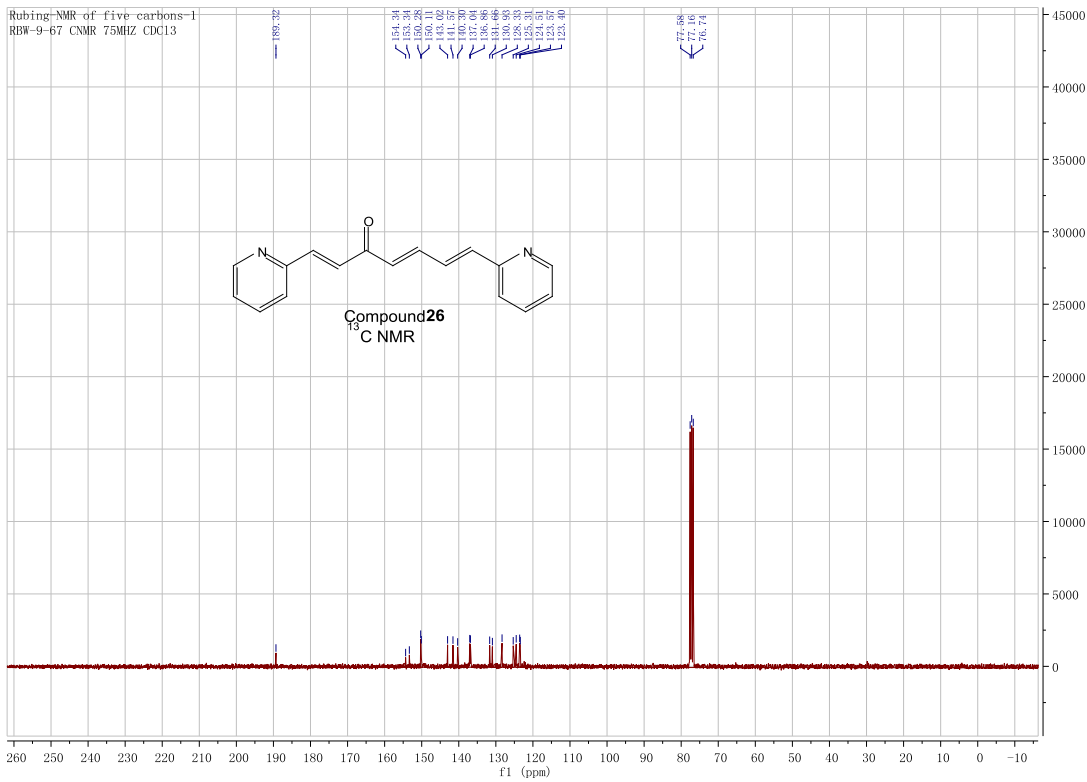

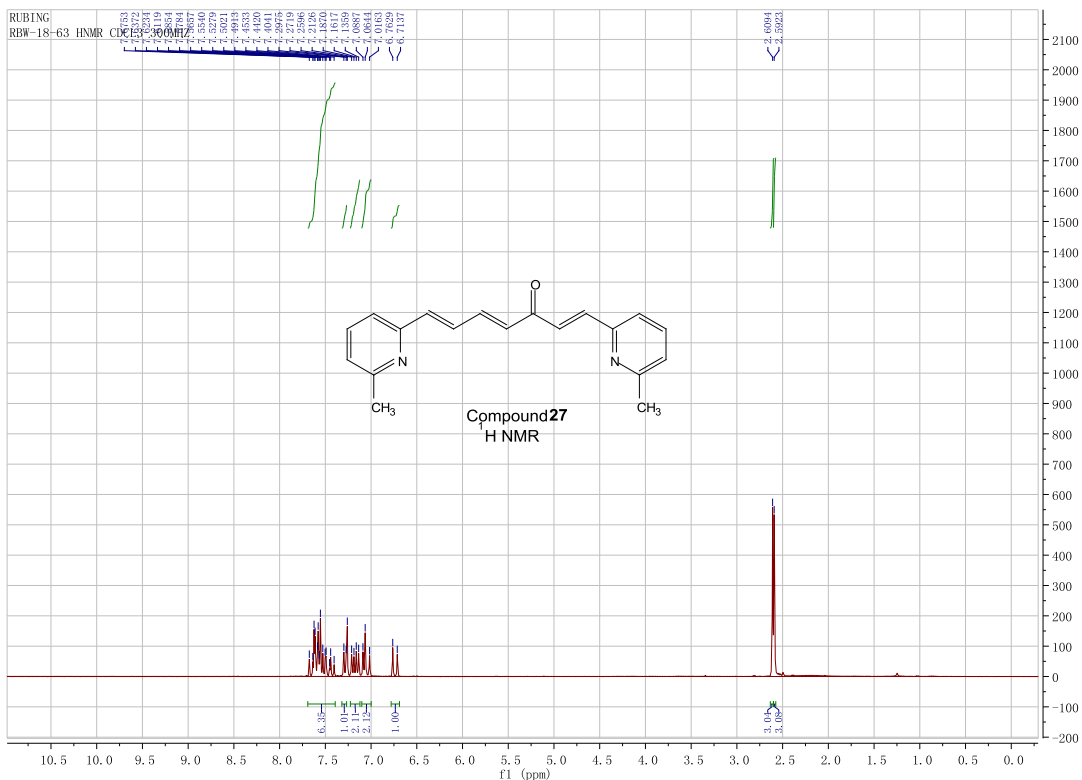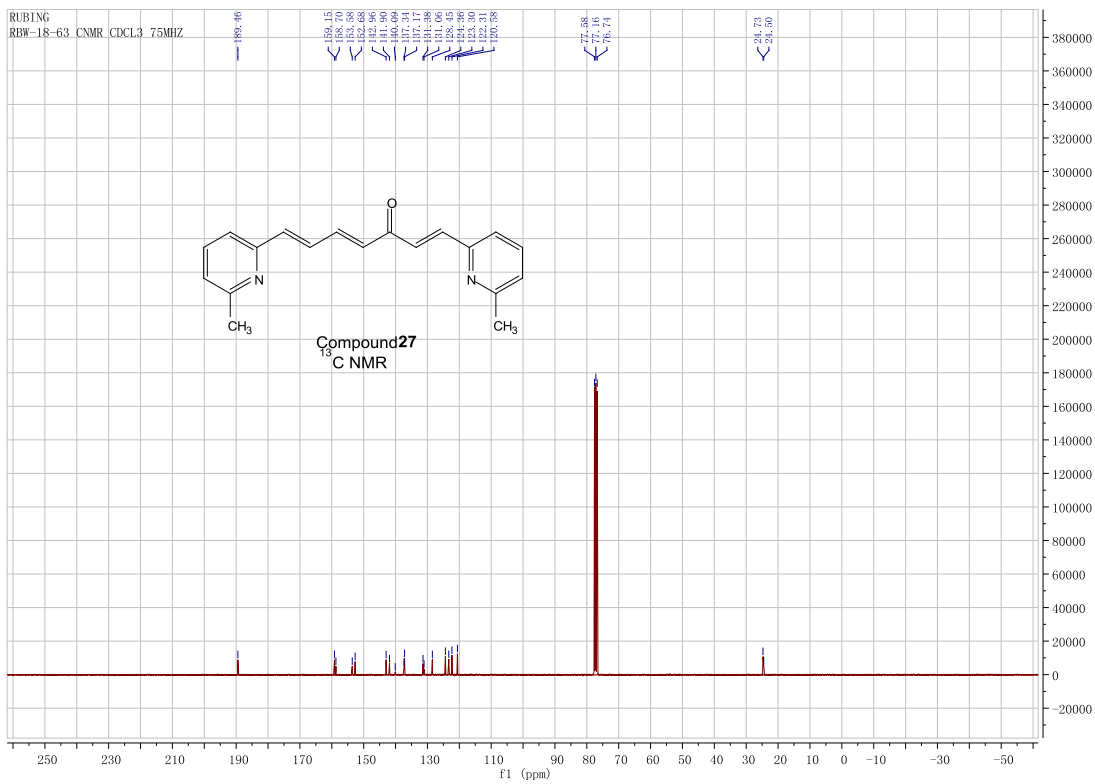

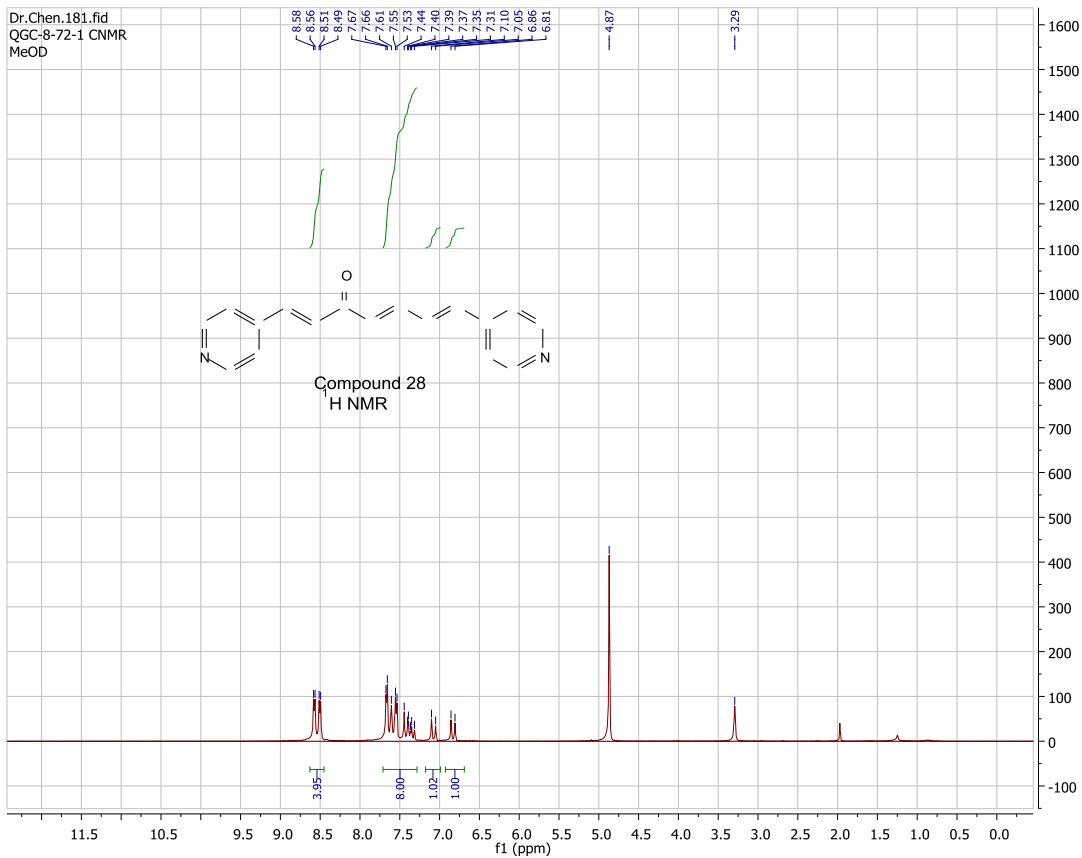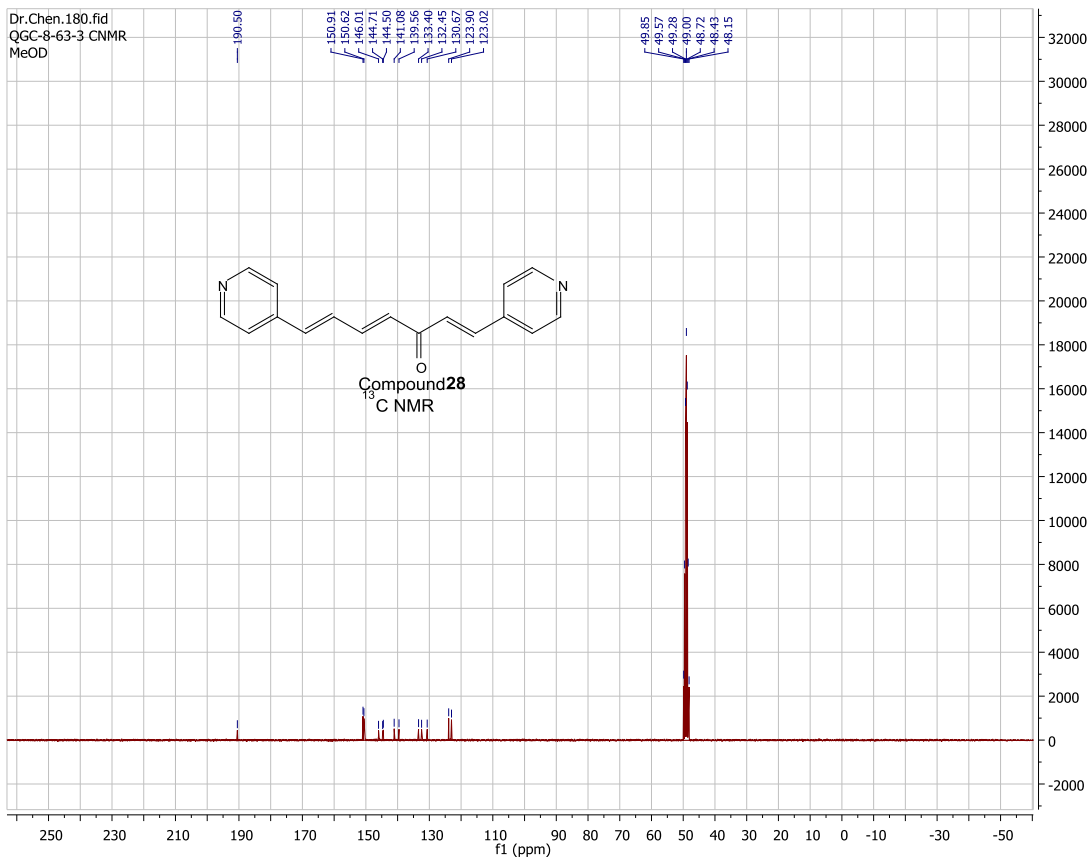



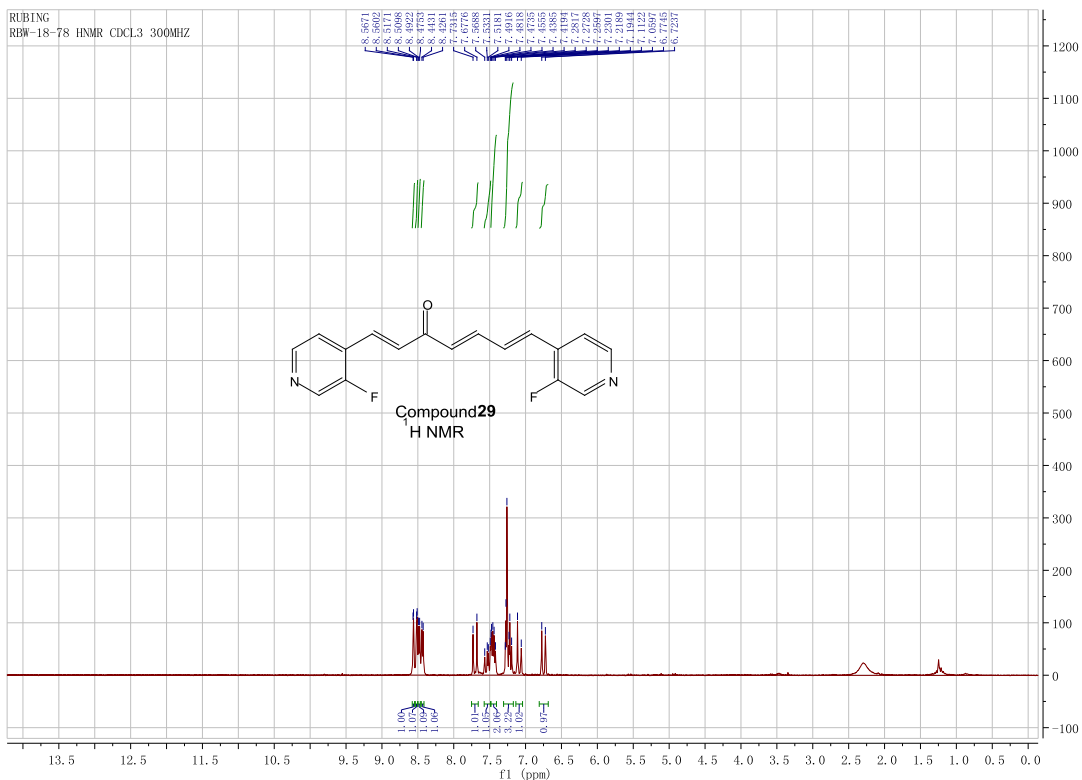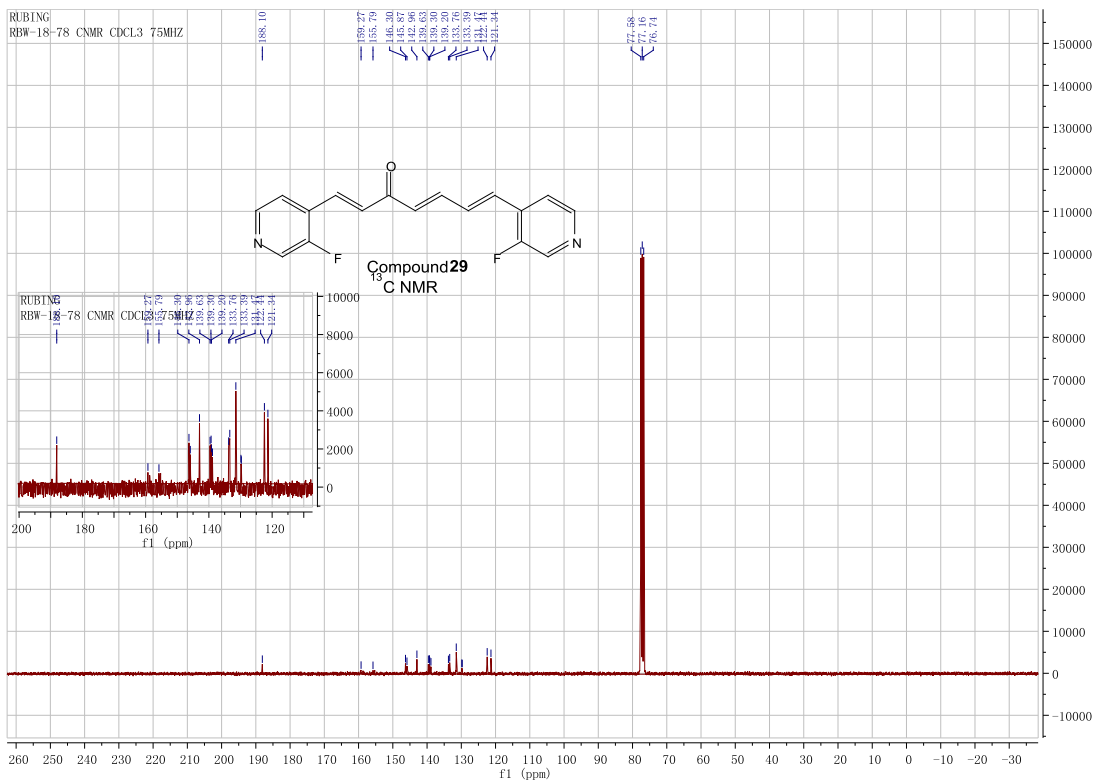

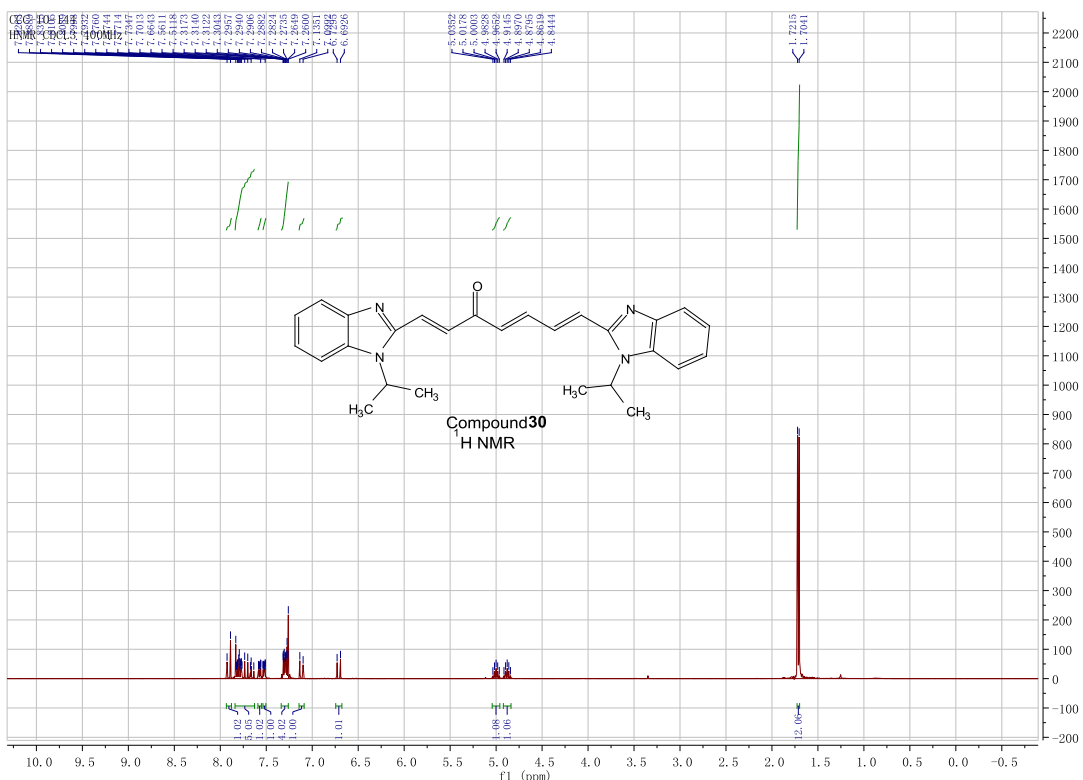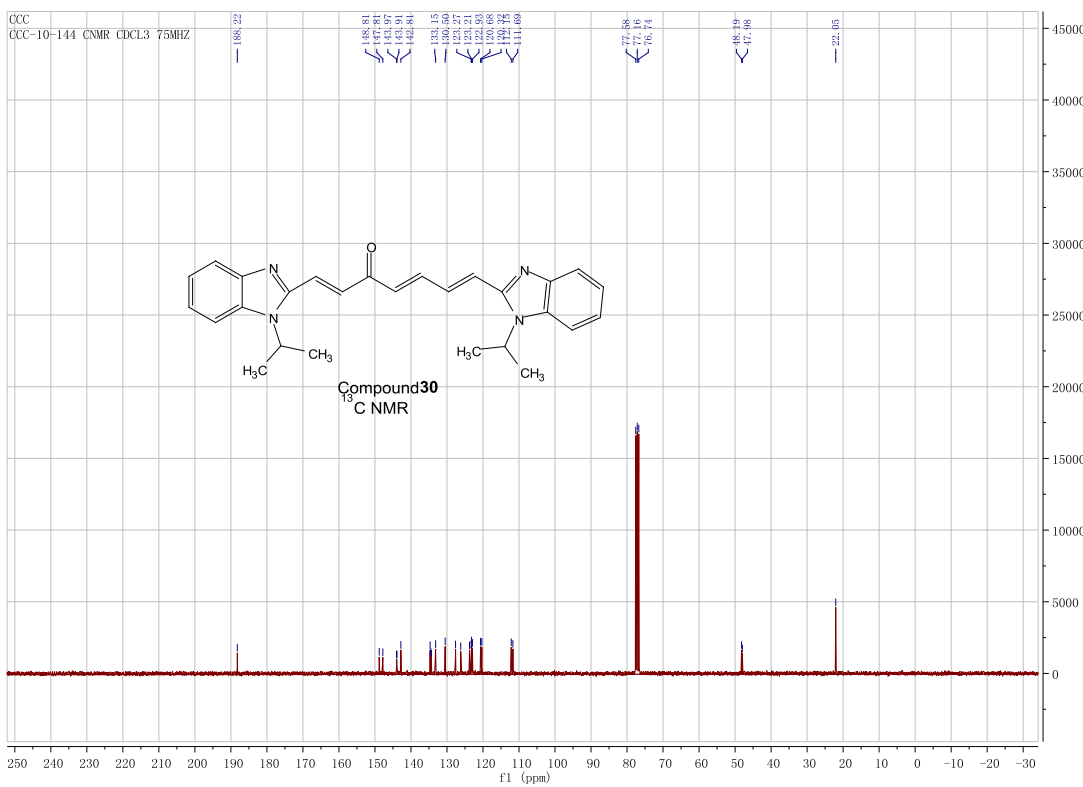

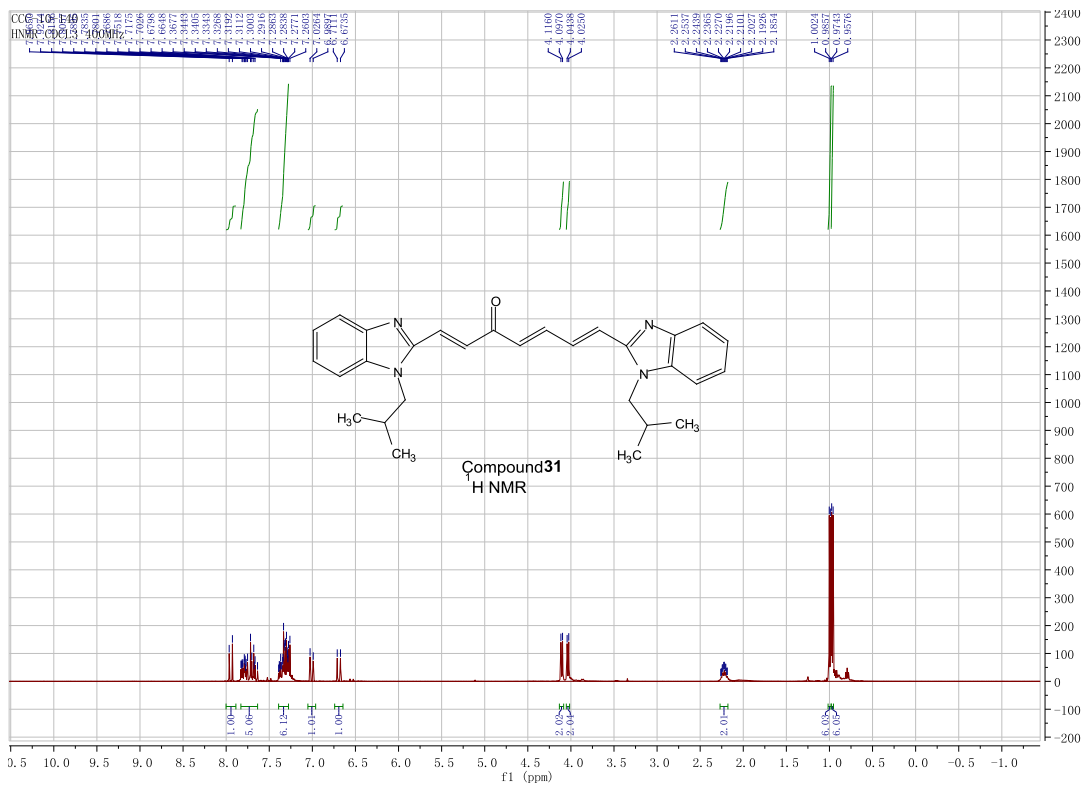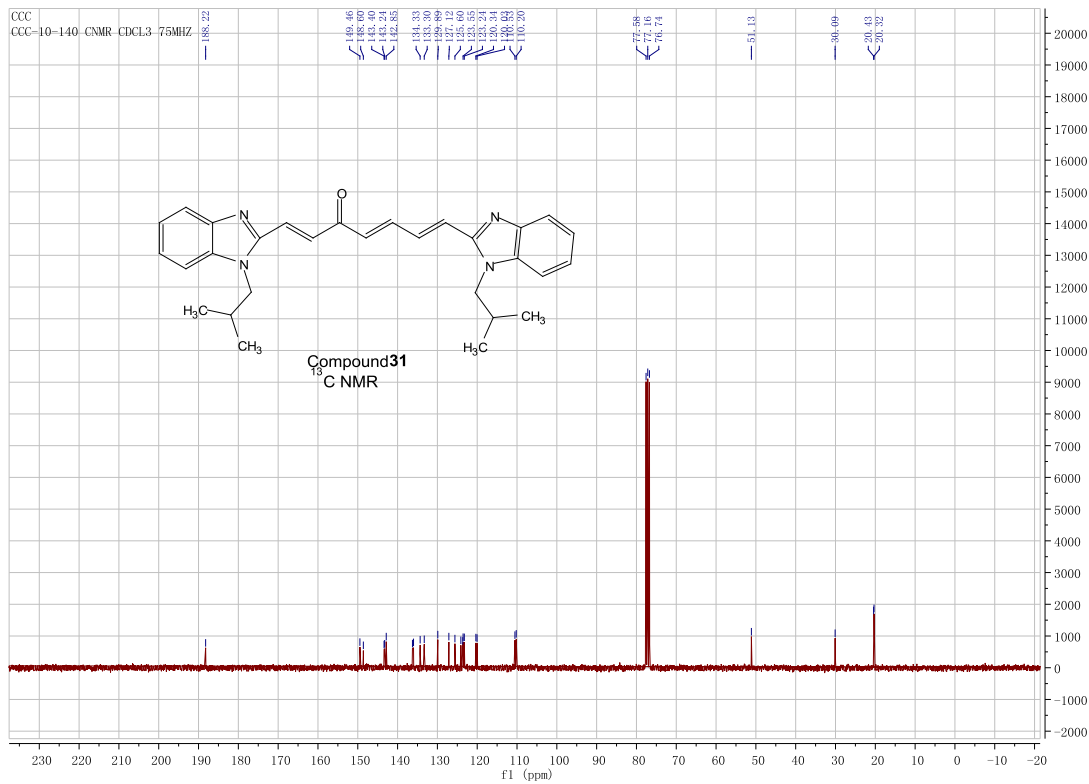

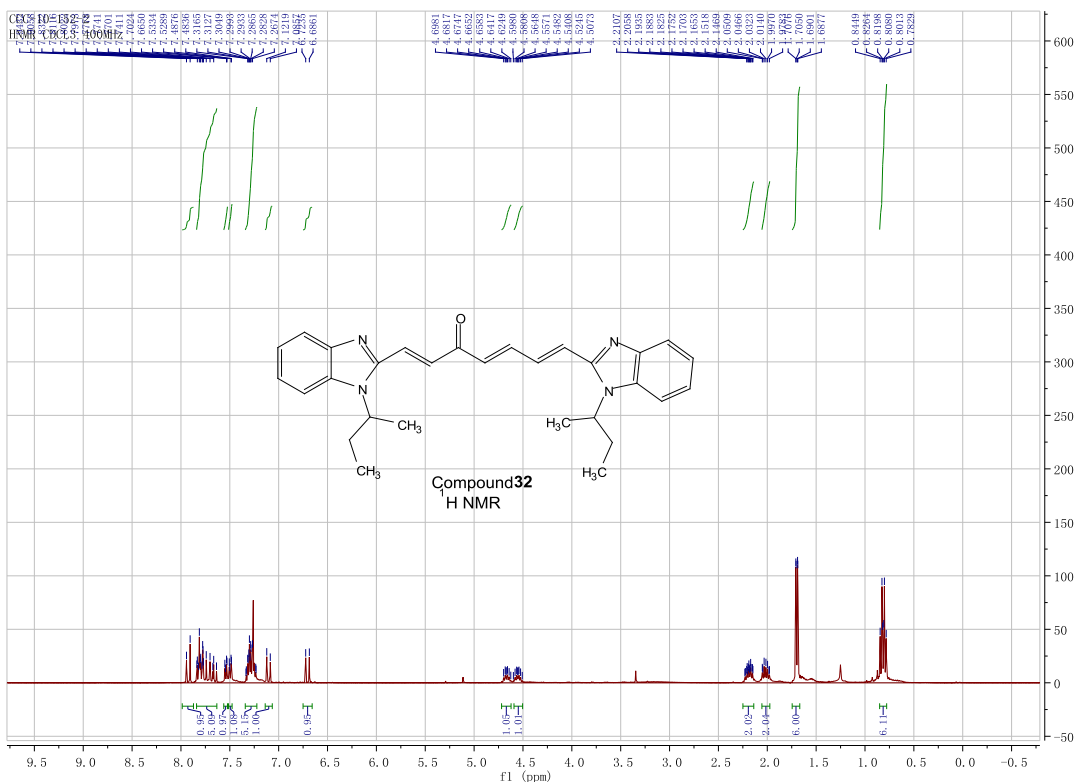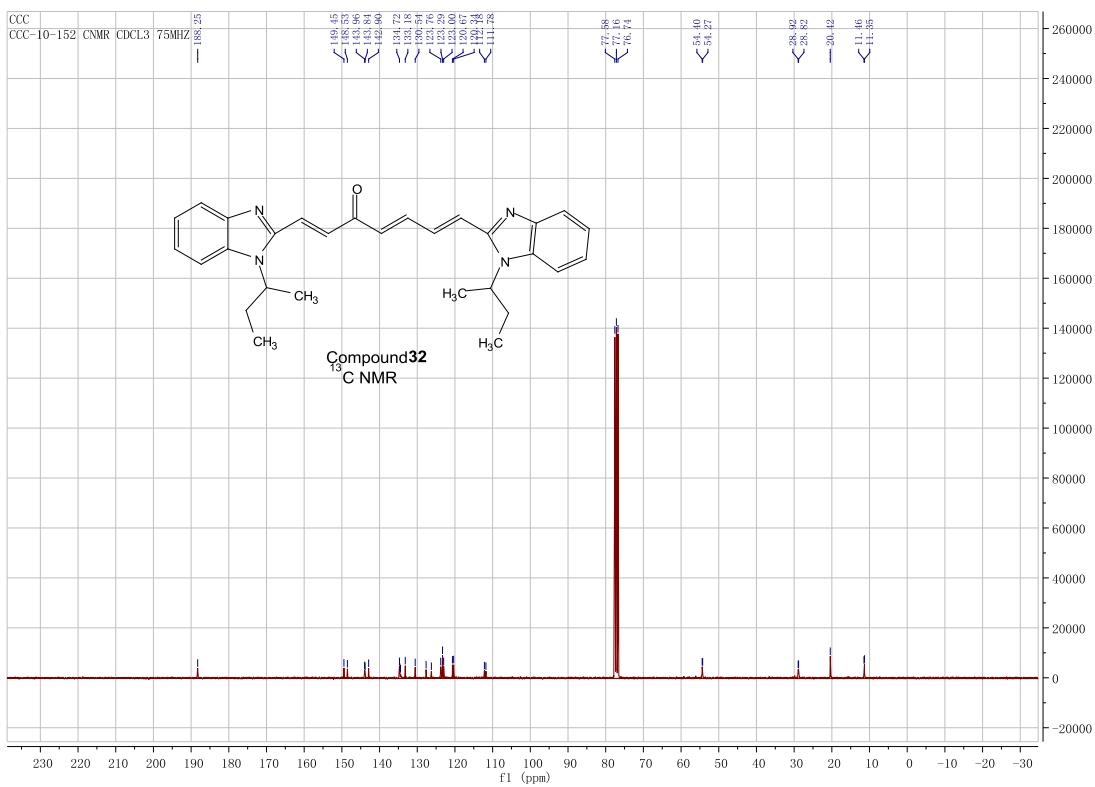

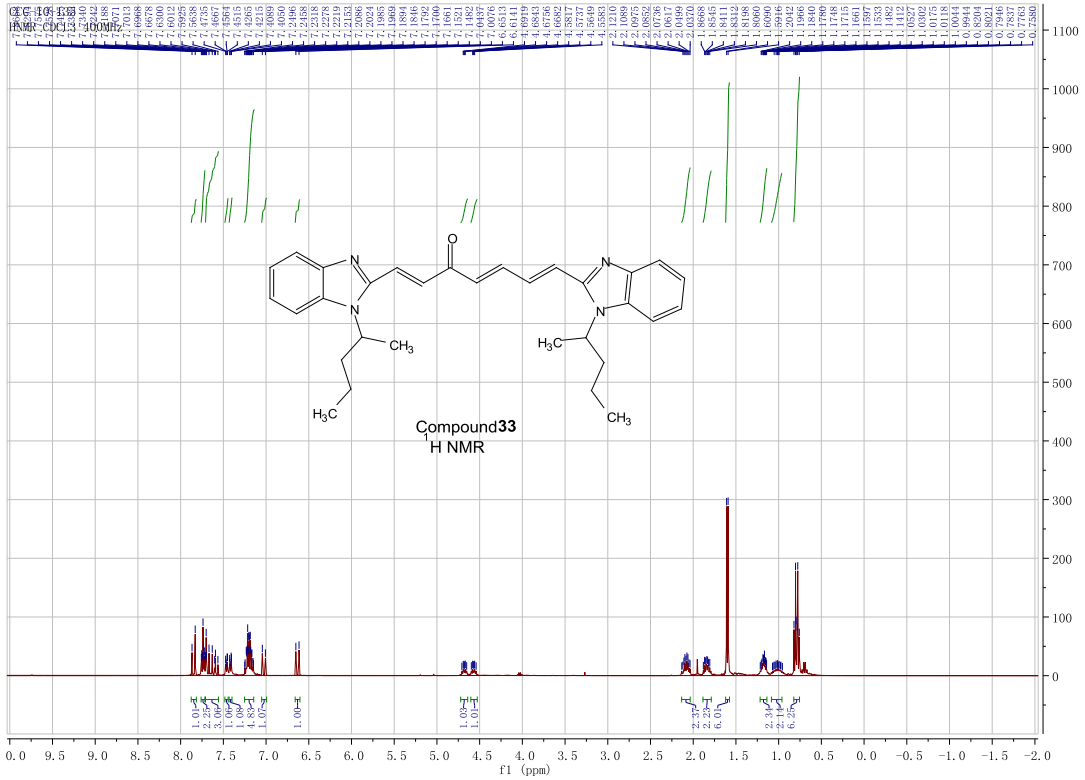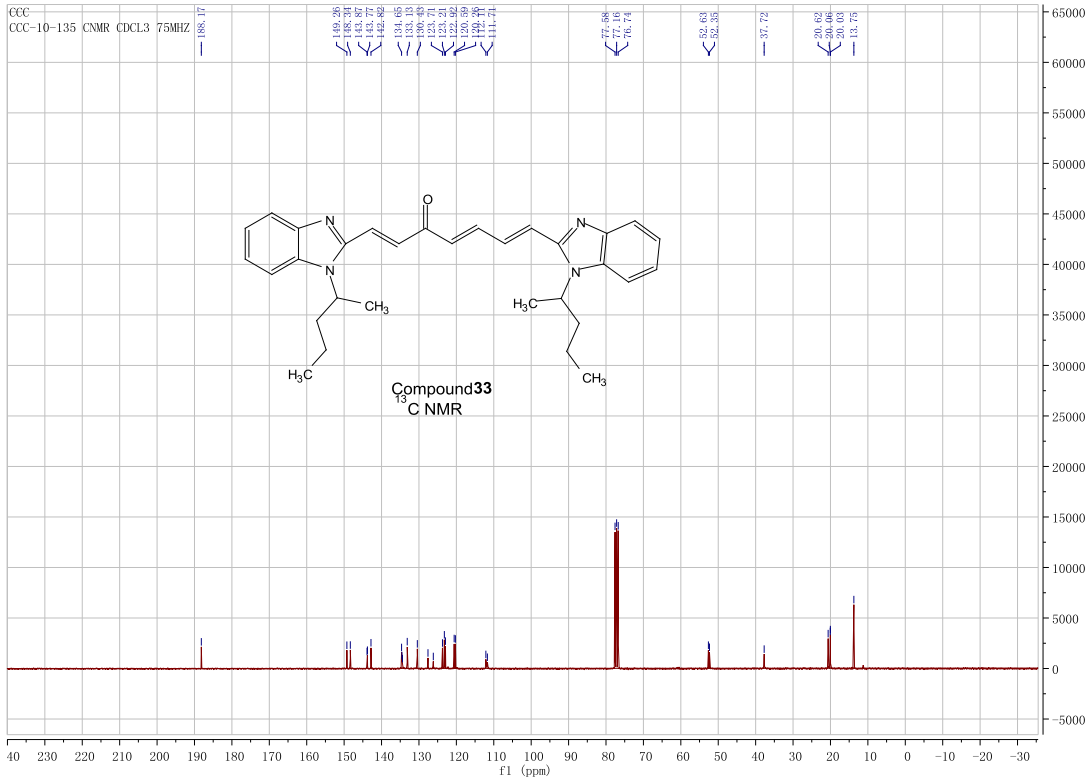

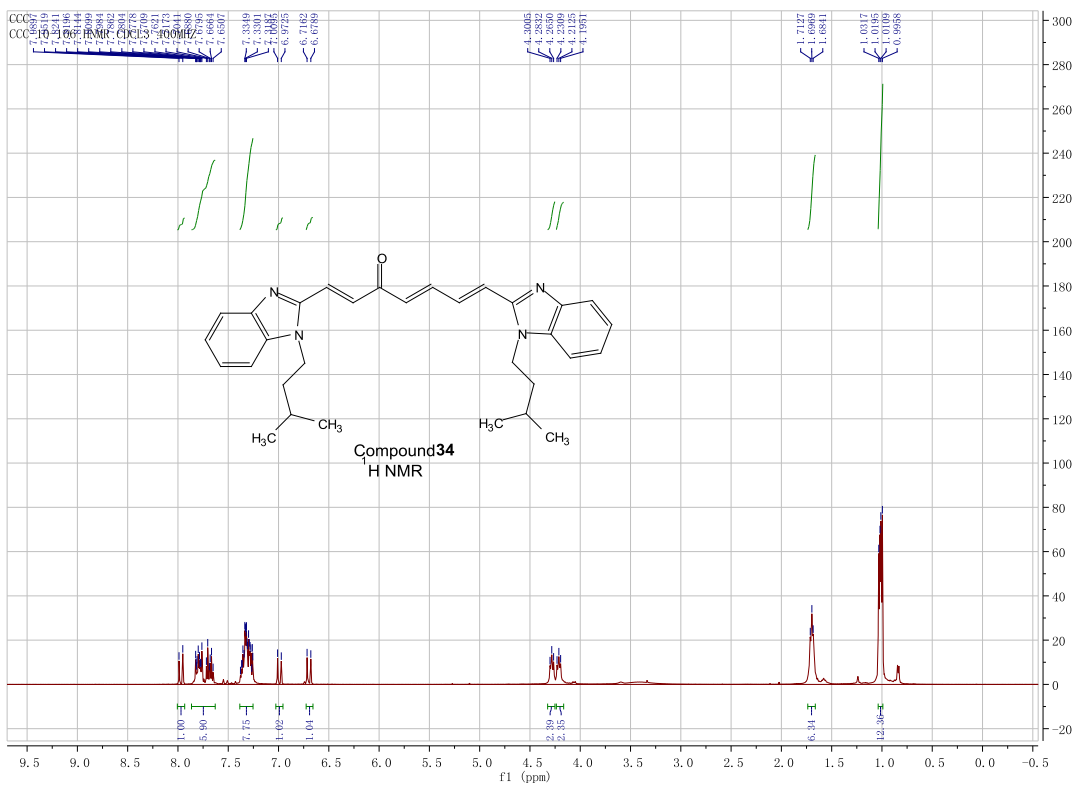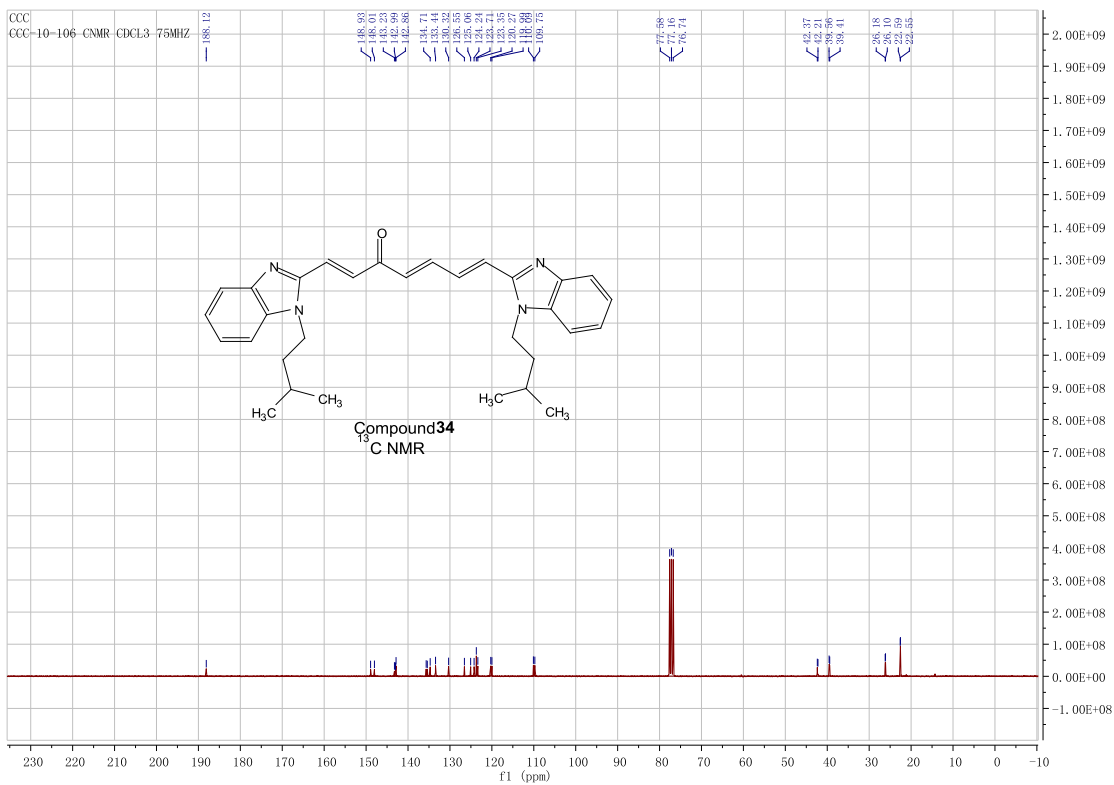

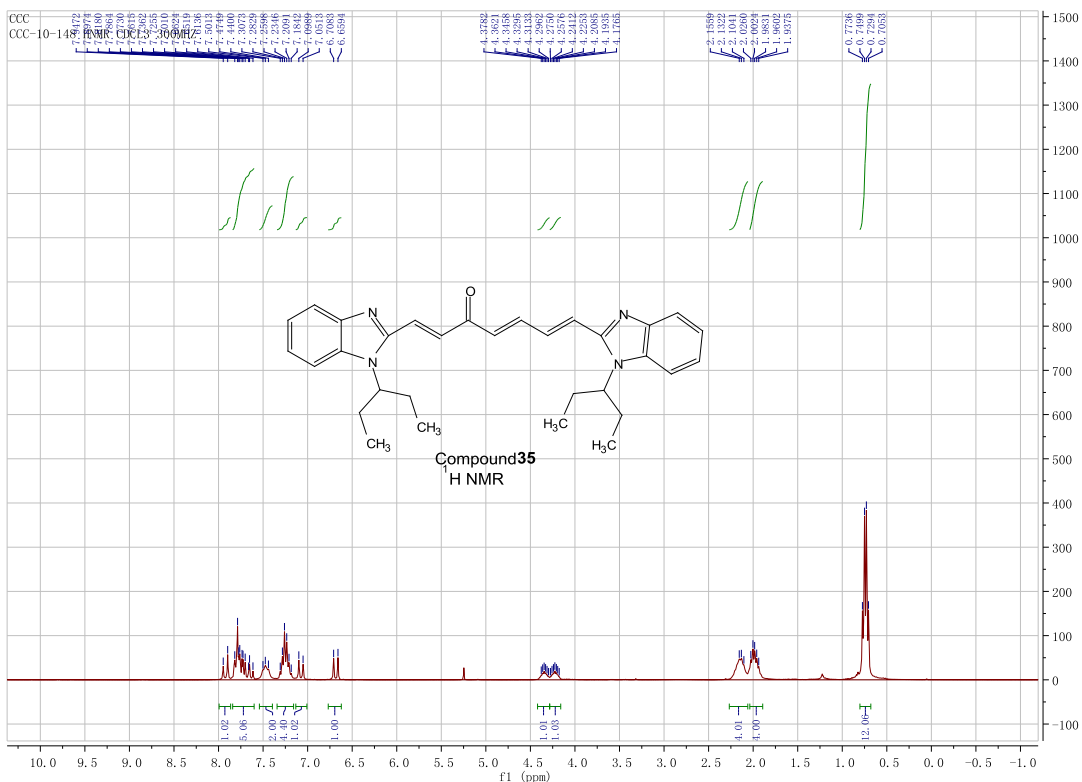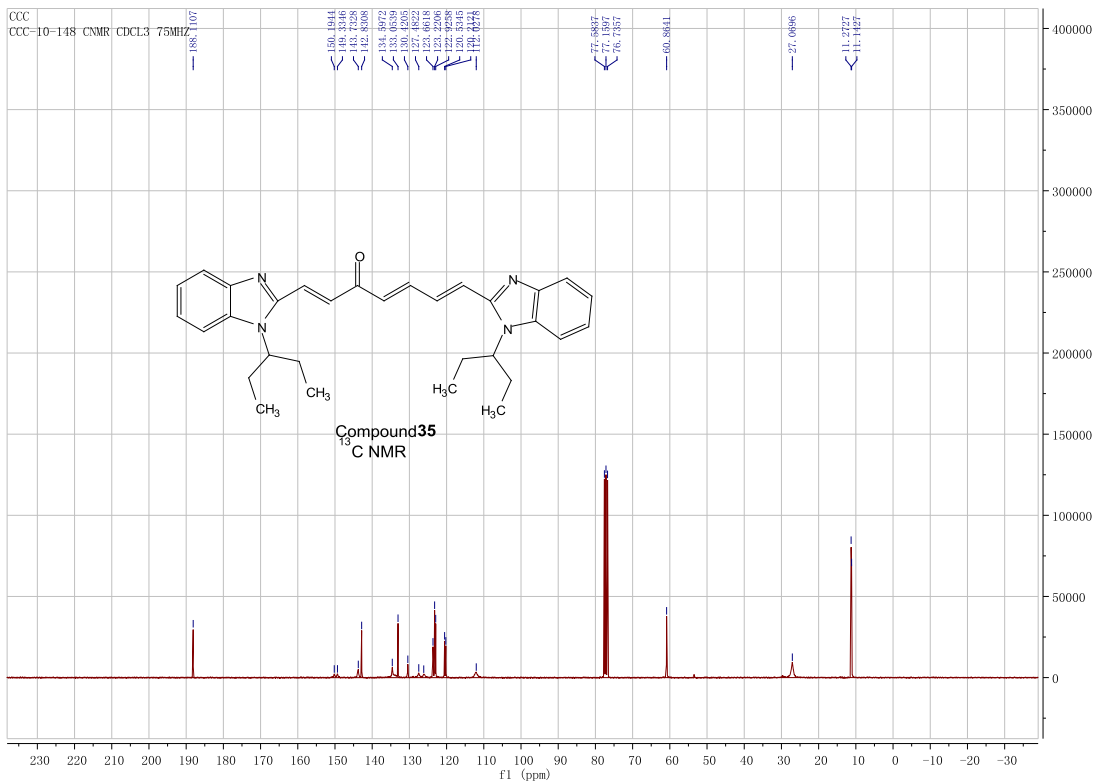

Supplement: NIHMS756133-supplement.pdf [file NIHMS756133-supplement.pdf]
